# Supplementary material
Source: publisher site journal article supplement (https://www.dovepress.com/article/419616)
Supplement: Supplementary file 1 [file get_supplementary_file.php]

Appendix Table 1 age-standardized incidence rates of malaria for both sexes in 2019

| measure   | location                         | sex  | age              | cause   | metric | year | val     | upper   | lower   |
|-----------|----------------------------------|------|------------------|---------|--------|------|---------|---------|---------|
| Incidence | Benin                            | Both | Age-standardized | Malaria | Rate   | 2019 | 27623.5 | 35038.8 | 22120   |
| Incidence | Liberia                          | Both | Age-standardized | Malaria | Rate   | 2019 | 27428   | 35833.4 | 18195.2 |
| Incidence | Central African Republic         | Both | Age-standardized | Malaria | Rate   | 2019 | 25301   | 35405   | 16640.2 |
| Incidence | Cote d'Ivoire                    | Both | Age-standardized | Malaria | Rate   | 2019 | 24841.5 | 35485.1 | 16135   |
| Incidence | Sierra Leone                     | Both | Age-standardized | Malaria | Rate   | 2019 | 24122.6 | 34152.4 | 13122.1 |
| Incidence | Democratic Republic of the Congo | Both | Age-standardized | Malaria | Rate   | 2019 | 23514.1 | 30543.8 | 17518.1 |
| Incidence | Gabon                            | Both | Age-standardized | Malaria | Rate   | 2019 | 22046.2 | 33956   | 10461.5 |
| Incidence | Mozambique                       | Both | Age-standardized | Malaria | Rate   | 2019 | 21491.3 | 26437.4 | 17436.5 |
| Incidence | Togo                             | Both | Age-standardized | Malaria | Rate   | 2019 | 21388.9 | 28674.5 | 14522.1 |
| Incidence | Nigeria                          | Both | Age-standardized | Malaria | Rate   | 2019 | 20459.7 | 26917.5 | 14280.5 |
| Incidence | Guinea                           | Both | Age-standardized | Malaria | Rate   | 2019 | 20441.7 | 30615.2 | 12104.4 |
| Incidence | Equatorial Guinea                | Both | Age-standardized | Malaria | Rate   | 2019 | 20277.1 | 30245.7 | 8406.4  |
| Incidence | Congo                            | Both | Age-standardized | Malaria | Rate   | 2019 | 20030.1 | 30571.9 | 11050.4 |
| Incidence | Cameroon                         | Both | Age-standardized | Malaria | Rate   | 2019 | 19014.6 | 30439   | 12327.3 |

|           |                             |      |                  |         |      |      |         |         |         |
|-----------|-----------------------------|------|------------------|---------|------|------|---------|---------|---------|
| Incidence | Ghana                       | Both | Age-standardized | Malaria | Rate | 2019 | 18734.1 | 26723.9 | 11740.7 |
| Incidence | Uganda                      | Both | Age-standardized | Malaria | Rate | 2019 | 18526.9 | 26122.8 | 11170.9 |
| Incidence | Burkina Faso                | Both | Age-standardized | Malaria | Rate | 2019 | 17566.7 | 21976.5 | 14232   |
| Incidence | South Sudan                 | Both | Age-standardized | Malaria | Rate | 2019 | 17378.7 | 27603.2 | 11034.7 |
| Incidence | Malawi                      | Both | Age-standardized | Malaria | Rate | 2019 | 16344.4 | 21529.4 | 10624.7 |
| Incidence | Mauritania                  | Both | Age-standardized | Malaria | Rate | 2019 | 16107.5 | 54135.3 | 2857.2  |
| Incidence | Angola                      | Both | Age-standardized | Malaria | Rate | 2019 | 15773.2 | 20402.5 | 10794.3 |
| Incidence | Niger                       | Both | Age-standardized | Malaria | Rate | 2019 | 15278.2 | 25591.7 | 7814.5  |
| Incidence | Burundi                     | Both | Age-standardized | Malaria | Rate | 2019 | 14106.6 | 22463.4 | 7735.8  |
| Incidence | Mali                        | Both | Age-standardized | Malaria | Rate | 2019 | 13021.2 | 18225.5 | 8448.1  |
| Incidence | Zambia                      | Both | Age-standardized | Malaria | Rate | 2019 | 11974.4 | 18017.8 | 7741.3  |
| Incidence | Chad                        | Both | Age-standardized | Malaria | Rate | 2019 | 11579.5 | 20153.6 | 6285.3  |
| Incidence | Papua New Guinea            | Both | Age-standardized | Malaria | Rate | 2019 | 10545.2 | 20594   | 4486.3  |
| Incidence | Guinea-Bissau               | Both | Age-standardized | Malaria | Rate | 2019 | 9748.8  | 20912.9 | 2735.5  |
| Incidence | United Republic of Tanzania | Both | Age-standardized | Malaria | Rate | 2019 | 9652.7  | 13316.3 | 6608.2  |

|           |                                    |      |                  |         |      |      |        |         |        |
|-----------|------------------------------------|------|------------------|---------|------|------|--------|---------|--------|
| Incidence | Kenya                              | Both | Age-standardized | Malaria | Rate | 2019 | 8749.9 | 13580.4 | 4867.8 |
| Incidence | Somalia                            | Both | Age-standardized | Malaria | Rate | 2019 | 8597.2 | 15277.4 | 4810.3 |
| Incidence | Madagascar                         | Both | Age-standardized | Malaria | Rate | 2019 | 8318.8 | 12112.6 | 5069.3 |
| Incidence | Gambia                             | Both | Age-standardized | Malaria | Rate | 2019 | 6917.6 | 16434.7 | 1867.9 |
| Incidence | Comoros                            | Both | Age-standardized | Malaria | Rate | 2019 | 6903.1 | 40106.6 | 207.8  |
| Incidence | Senegal                            | Both | Age-standardized | Malaria | Rate | 2019 | 6808.9 | 17429.2 | 1841   |
| Incidence | Namibia                            | Both | Age-standardized | Malaria | Rate | 2019 | 6748.6 | 36645.3 | 301.5  |
| Incidence | Solomon Islands                    | Both | Age-standardized | Malaria | Rate | 2019 | 6719.3 | 16625   | 1915.7 |
| Incidence | Ethiopia                           | Both | Age-standardized | Malaria | Rate | 2019 | 6526.6 | 14610.4 | 2417.3 |
| Incidence | Venezuela (Bolivarian Republic of) | Both | Age-standardized | Malaria | Rate | 2019 | 6240.5 | 20082.1 | 1281.9 |
| Incidence | Rwanda                             | Both | Age-standardized | Malaria | Rate | 2019 | 4740.2 | 9350.6  | 1808.6 |
| Incidence | Sudan                              | Both | Age-standardized | Malaria | Rate | 2019 | 4190.4 | 7872.9  | 2253.9 |
| Incidence | Guyana                             | Both | Age-standardized | Malaria | Rate | 2019 | 4056.9 | 7842.8  | 1724   |
| Incidence | Zimbabwe                           | Both | Age-standardized | Malaria | Rate | 2019 | 3878   | 11763.9 | 797.8  |
| Incidence | Djibouti                           | Both | Age-standardized | Malaria | Rate | 2019 | 3753.1 | 22067.1 | 66.6   |

|           |                                  |      |                  |         |      |      |        |        |        |
|-----------|----------------------------------|------|------------------|---------|------|------|--------|--------|--------|
| Incidence | Yemen                            | Both | Age-standardized | Malaria | Rate | 2019 | 3575.4 | 7605.5 | 1437.2 |
| Incidence | Sao Tome and Principe            | Both | Age-standardized | Malaria | Rate | 2019 | 3325.7 | 4555.9 | 1593.4 |
| Incidence | Eritrea                          | Both | Age-standardized | Malaria | Rate | 2019 | 2827.8 | 7466.7 | 824.7  |
| Incidence | Afghanistan                      | Both | Age-standardized | Malaria | Rate | 2019 | 2661.9 | 8234.5 | 508.6  |
| Incidence | Pakistan                         | Both | Age-standardized | Malaria | Rate | 2019 | 1045.2 | 1760.3 | 584.9  |
| Incidence | India                            | Both | Age-standardized | Malaria | Rate | 2019 | 700.8  | 1325.6 | 349.9  |
| Incidence | Cabo Verde                       | Both | Age-standardized | Malaria | Rate | 2019 | 597    | 3287.1 | 1.1    |
| Incidence | Haiti                            | Both | Age-standardized | Malaria | Rate | 2019 | 565.8  | 1797.8 | 102    |
| Incidence | Nicaragua                        | Both | Age-standardized | Malaria | Rate | 2019 | 420.3  | 1076.2 | 8.2    |
| Incidence | Vanuatu                          | Both | Age-standardized | Malaria | Rate | 2019 | 392.8  | 1505.1 | 54.1   |
| Incidence | Indonesia                        | Both | Age-standardized | Malaria | Rate | 2019 | 285.4  | 724.7  | 90.9   |
| Incidence | Cambodia                         | Both | Age-standardized | Malaria | Rate | 2019 | 275    | 664.5  | 83.7   |
| Incidence | Peru                             | Both | Age-standardized | Malaria | Rate | 2019 | 261.9  | 583.6  | 104.1  |
| Incidence | Lao People's Democratic Republic | Both | Age-standardized | Malaria | Rate | 2019 | 253.3  | 898.3  | 52     |
| Incidence | South Africa                     | Both | Age-standardized | Malaria | Rate | 2019 | 250.2  | 1606.4 | 7.7    |

|           |                                                |      |                  |         |      |      |       |       |      |
|-----------|------------------------------------------------|------|------------------|---------|------|------|-------|-------|------|
| Incidence | Botswana                                       | Both | Age-standardized | Malaria | Rate | 2019 | 191.7 | 321.6 | 9.3  |
| Incidence | Suriname                                       | Both | Age-standardized | Malaria | Rate | 2019 | 183.6 | 556.8 | 0    |
| Incidence | Colombia                                       | Both | Age-standardized | Malaria | Rate | 2019 | 162   | 315.4 | 74.6 |
| Incidence | Eswatini                                       | Both | Age-standardized | Malaria | Rate | 2019 | 134.7 | 314.3 | 0    |
| Incidence | Brazil                                         | Both | Age-standardized | Malaria | Rate | 2019 | 119.3 | 204.1 | 62   |
| Incidence | Myanmar                                        | Both | Age-standardized | Malaria | Rate | 2019 | 112.9 | 663.9 | 0    |
| Incidence | Ecuador                                        | Both | Age-standardized | Malaria | Rate | 2019 | 64.3  | 238.5 | 10.1 |
| Incidence | Guatemala                                      | Both | Age-standardized | Malaria | Rate | 2019 | 52.1  | 105.8 | 21.9 |
| Incidence | Honduras                                       | Both | Age-standardized | Malaria | Rate | 2019 | 49.2  | 138.2 | 3.6  |
| Incidence | Bolivia<br>(Plurinational State of)            | Both | Age-standardized | Malaria | Rate | 2019 | 46.4  | 229.6 | 2.6  |
| Incidence | Panama                                         | Both | Age-standardized | Malaria | Rate | 2019 | 44.9  | 160.6 | 5.8  |
| Incidence | Democratic<br>People's<br>Republic of<br>Korea | Both | Age-standardized | Malaria | Rate | 2019 | 34.9  | 125.1 | 4.4  |
| Incidence | Malaysia                                       | Both | Age-standardized | Malaria | Rate | 2019 | 17.6  | 38.2  | 7.1  |
| Incidence | Viet Nam                                       | Both | Age-standardized | Malaria | Rate | 2019 | 17.2  | 34.8  | 5.8  |
| Incidence | Philippines                                    | Both | Age-standardized | Malaria | Rate | 2019 | 10.7  | 27.3  | 3.3  |

|           |                            |      |                  |         |      |      |      |      |     |
|-----------|----------------------------|------|------------------|---------|------|------|------|------|-----|
| Incidence | Bhutan                     | Both | Age-standardized | Malaria | Rate | 2019 | 10.3 | 37.5 | 1.4 |
| Incidence | Thailand                   | Both | Age-standardized | Malaria | Rate | 2019 | 8.6  | 15.6 | 0.3 |
| Incidence | Dominican Republic         | Both | Age-standardized | Malaria | Rate | 2019 | 8.5  | 26.1 | 1.7 |
| Incidence | Nepal                      | Both | Age-standardized | Malaria | Rate | 2019 | 6.4  | 25.8 | 1   |
| Incidence | Bangladesh                 | Both | Age-standardized | Malaria | Rate | 2019 | 5.9  | 25.4 | 0.6 |
| Incidence | Belize                     | Both | Age-standardized | Malaria | Rate | 2019 | 3.8  | 8.7  | 0   |
| Incidence | Timor-Leste                | Both | Age-standardized | Malaria | Rate | 2019 | 3.6  | 8.9  | 0   |
| Incidence | Saudi Arabia               | Both | Age-standardized | Malaria | Rate | 2019 | 3.1  | 15.1 | 0.1 |
| Incidence | Republic of Korea          | Both | Age-standardized | Malaria | Rate | 2019 | 0.9  | 3.5  | 0.1 |
| Incidence | Mexico                     | Both | Age-standardized | Malaria | Rate | 2019 | 0.9  | 1.9  | 0.3 |
| Incidence | El Salvador                | Both | Age-standardized | Malaria | Rate | 2019 | 0.4  | 1.8  | 0   |
| Incidence | Iran (Islamic Republic of) | Both | Age-standardized | Malaria | Rate | 2019 | 0.1  | 0.6  | 0   |
| Incidence | Algeria                    | Both | Age-standardized | Malaria | Rate | 2019 | 0    | 0.1  | 0   |
| Incidence | Belarus                    | Both | Age-standardized | Malaria | Rate | 2019 | 0    | 0    | 0   |
| Incidence | Taiwan (Province of China) | Both | Age-standardized | Malaria | Rate | 2019 | 0    | 0    | 0   |

|           |                        |      |                  |         |      |      |   |   |   |
|-----------|------------------------|------|------------------|---------|------|------|---|---|---|
| Incidence | Estonia                | Both | Age-standardized | Malaria | Rate | 2019 | 0 | 0 | 0 |
| Incidence | Azerbaijan             | Both | Age-standardized | Malaria | Rate | 2019 | 0 | 0 | 0 |
| Incidence | Antigua and Barbuda    | Both | Age-standardized | Malaria | Rate | 2019 | 0 | 0 | 0 |
| Incidence | Syrian Arab Republic   | Both | Age-standardized | Malaria | Rate | 2019 | 0 | 0 | 0 |
| Incidence | Georgia                | Both | Age-standardized | Malaria | Rate | 2019 | 0 | 0 | 0 |
| Incidence | Armenia                | Both | Age-standardized | Malaria | Rate | 2019 | 0 | 0 | 0 |
| Incidence | Israel                 | Both | Age-standardized | Malaria | Rate | 2019 | 0 | 0 | 0 |
| Incidence | Spain                  | Both | Age-standardized | Malaria | Rate | 2019 | 0 | 0 | 0 |
| Incidence | Bahrain                | Both | Age-standardized | Malaria | Rate | 2019 | 0 | 0 | 0 |
| Incidence | Bulgaria               | Both | Age-standardized | Malaria | Rate | 2019 | 0 | 0 | 0 |
| Incidence | Bosnia and Herzegovina | Both | Age-standardized | Malaria | Rate | 2019 | 0 | 0 | 0 |
| Incidence | Italy                  | Both | Age-standardized | Malaria | Rate | 2019 | 0 | 0 | 0 |
| Incidence | Greece                 | Both | Age-standardized | Malaria | Rate | 2019 | 0 | 0 | 0 |
| Incidence | France                 | Both | Age-standardized | Malaria | Rate | 2019 | 0 | 0 | 0 |
| Incidence | Sweden                 | Both | Age-standardized | Malaria | Rate | 2019 | 0 | 0 | 0 |

|           |             |      |                  |         |      |      |   |   |   |
|-----------|-------------|------|------------------|---------|------|------|---|---|---|
| Incidence | San Marino  | Both | Age-standardized | Malaria | Rate | 2019 | 0 | 0 | 0 |
| Incidence | Singapore   | Both | Age-standardized | Malaria | Rate | 2019 | 0 | 0 | 0 |
| Incidence | Iceland     | Both | Age-standardized | Malaria | Rate | 2019 | 0 | 0 | 0 |
| Incidence | Switzerland | Both | Age-standardized | Malaria | Rate | 2019 | 0 | 0 | 0 |
| Incidence | Egypt       | Both | Age-standardized | Malaria | Rate | 2019 | 0 | 0 | 0 |
| Incidence | Fiji        | Both | Age-standardized | Malaria | Rate | 2019 | 0 | 0 | 0 |
| Incidence | China       | Both | Age-standardized | Malaria | Rate | 2019 | 0 | 0 | 0 |
| Incidence | Croatia     | Both | Age-standardized | Malaria | Rate | 2019 | 0 | 0 | 0 |
| Incidence | Luxembourg  | Both | Age-standardized | Malaria | Rate | 2019 | 0 | 0 | 0 |
| Incidence | Monaco      | Both | Age-standardized | Malaria | Rate | 2019 | 0 | 0 | 0 |
| Incidence | Germany     | Both | Age-standardized | Malaria | Rate | 2019 | 0 | 0 | 0 |
| Incidence | Tokelau     | Both | Age-standardized | Malaria | Rate | 2019 | 0 | 0 | 0 |
| Incidence | Ireland     | Both | Age-standardized | Malaria | Rate | 2019 | 0 | 0 | 0 |
| Incidence | Nauru       | Both | Age-standardized | Malaria | Rate | 2019 | 0 | 0 | 0 |
| Incidence | Tuvalu      | Both | Age-standardized | Malaria | Rate | 2019 | 0 | 0 | 0 |

|           |                              |      |                  |         |      |      |   |   |   |
|-----------|------------------------------|------|------------------|---------|------|------|---|---|---|
| Incidence | Australia                    | Both | Age-standardized | Malaria | Rate | 2019 | 0 | 0 | 0 |
| Incidence | Kiribati                     | Both | Age-standardized | Malaria | Rate | 2019 | 0 | 0 | 0 |
| Incidence | Iraq                         | Both | Age-standardized | Malaria | Rate | 2019 | 0 | 0 | 0 |
| Incidence | United Kingdom               | Both | Age-standardized | Malaria | Rate | 2019 | 0 | 0 | 0 |
| Incidence | United States Virgin Islands | Both | Age-standardized | Malaria | Rate | 2019 | 0 | 0 | 0 |
| Incidence | New Zealand                  | Both | Age-standardized | Malaria | Rate | 2019 | 0 | 0 | 0 |
| Incidence | Samoa                        | Both | Age-standardized | Malaria | Rate | 2019 | 0 | 0 | 0 |
| Incidence | Russian Federation           | Both | Age-standardized | Malaria | Rate | 2019 | 0 | 0 | 0 |
| Incidence | Lithuania                    | Both | Age-standardized | Malaria | Rate | 2019 | 0 | 0 | 0 |
| Incidence | Latvia                       | Both | Age-standardized | Malaria | Rate | 2019 | 0 | 0 | 0 |
| Incidence | Tajikistan                   | Both | Age-standardized | Malaria | Rate | 2019 | 0 | 0 | 0 |
| Incidence | Chile                        | Both | Age-standardized | Malaria | Rate | 2019 | 0 | 0 | 0 |
| Incidence | Turkmenistan                 | Both | Age-standardized | Malaria | Rate | 2019 | 0 | 0 | 0 |
| Incidence | Hungary                      | Both | Age-standardized | Malaria | Rate | 2019 | 0 | 0 | 0 |
| Incidence | North Macedonia              | Both | Age-standardized | Malaria | Rate | 2019 | 0 | 0 | 0 |

|           |                     |      |                  |         |      |      |   |   |   |
|-----------|---------------------|------|------------------|---------|------|------|---|---|---|
| Incidence | Czechia             | Both | Age-standardized | Malaria | Rate | 2019 | 0 | 0 | 0 |
| Incidence | Uruguay             | Both | Age-standardized | Malaria | Rate | 2019 | 0 | 0 | 0 |
| Incidence | Guam                | Both | Age-standardized | Malaria | Rate | 2019 | 0 | 0 | 0 |
| Incidence | Trinidad and Tobago | Both | Age-standardized | Malaria | Rate | 2019 | 0 | 0 | 0 |
| Incidence | Marshall Islands    | Both | Age-standardized | Malaria | Rate | 2019 | 0 | 0 | 0 |
| Incidence | Cook Islands        | Both | Age-standardized | Malaria | Rate | 2019 | 0 | 0 | 0 |
| Incidence | Barbados            | Both | Age-standardized | Malaria | Rate | 2019 | 0 | 0 | 0 |
| Incidence | Republic of Moldova | Both | Age-standardized | Malaria | Rate | 2019 | 0 | 0 | 0 |
| Incidence | Maldives            | Both | Age-standardized | Malaria | Rate | 2019 | 0 | 0 | 0 |
| Incidence | Uzbekistan          | Both | Age-standardized | Malaria | Rate | 2019 | 0 | 0 | 0 |
| Incidence | Ukraine             | Both | Age-standardized | Malaria | Rate | 2019 | 0 | 0 | 0 |
| Incidence | Tunisia             | Both | Age-standardized | Malaria | Rate | 2019 | 0 | 0 | 0 |
| Incidence | Montenegro          | Both | Age-standardized | Malaria | Rate | 2019 | 0 | 0 | 0 |
| Incidence | Argentina           | Both | Age-standardized | Malaria | Rate | 2019 | 0 | 0 | 0 |
| Incidence | Lesotho             | Both | Age-standardized | Malaria | Rate | 2019 | 0 | 0 | 0 |

|           |                                  |      |                  |         |      |      |   |   |   |
|-----------|----------------------------------|------|------------------|---------|------|------|---|---|---|
| Incidence | Dominica                         | Both | Age-standardized | Malaria | Rate | 2019 | 0 | 0 | 0 |
| Incidence | Cuba                             | Both | Age-standardized | Malaria | Rate | 2019 | 0 | 0 | 0 |
| Incidence | Kazakhstan                       | Both | Age-standardized | Malaria | Rate | 2019 | 0 | 0 | 0 |
| Incidence | Romania                          | Both | Age-standardized | Malaria | Rate | 2019 | 0 | 0 | 0 |
| Incidence | Bahamas                          | Both | Age-standardized | Malaria | Rate | 2019 | 0 | 0 | 0 |
| Incidence | Andorra                          | Both | Age-standardized | Malaria | Rate | 2019 | 0 | 0 | 0 |
| Incidence | Sri Lanka                        | Both | Age-standardized | Malaria | Rate | 2019 | 0 | 0 | 0 |
| Incidence | Poland                           | Both | Age-standardized | Malaria | Rate | 2019 | 0 | 0 | 0 |
| Incidence | Kyrgyzstan                       | Both | Age-standardized | Malaria | Rate | 2019 | 0 | 0 | 0 |
| Incidence | Saint Lucia                      | Both | Age-standardized | Malaria | Rate | 2019 | 0 | 0 | 0 |
| Incidence | Grenada                          | Both | Age-standardized | Malaria | Rate | 2019 | 0 | 0 | 0 |
| Incidence | Micronesia (Federated States of) | Both | Age-standardized | Malaria | Rate | 2019 | 0 | 0 | 0 |
| Incidence | Jamaica                          | Both | Age-standardized | Malaria | Rate | 2019 | 0 | 0 | 0 |
| Incidence | Libya                            | Both | Age-standardized | Malaria | Rate | 2019 | 0 | 0 | 0 |
| Incidence | Turkey                           | Both | Age-standardized | Malaria | Rate | 2019 | 0 | 0 | 0 |

|           |                                  |      |                  |         |      |      |   |   |   |
|-----------|----------------------------------|------|------------------|---------|------|------|---|---|---|
| Incidence | Tonga                            | Both | Age-standardized | Malaria | Rate | 2019 | 0 | 0 | 0 |
| Incidence | Mongolia                         | Both | Age-standardized | Malaria | Rate | 2019 | 0 | 0 | 0 |
| Incidence | Greenland                        | Both | Age-standardized | Malaria | Rate | 2019 | 0 | 0 | 0 |
| Incidence | Saint Vincent and the Grenadines | Both | Age-standardized | Malaria | Rate | 2019 | 0 | 0 | 0 |
| Incidence | Malta                            | Both | Age-standardized | Malaria | Rate | 2019 | 0 | 0 | 0 |
| Incidence | United Arab Emirates             | Both | Age-standardized | Malaria | Rate | 2019 | 0 | 0 | 0 |
| Incidence | Bermuda                          | Both | Age-standardized | Malaria | Rate | 2019 | 0 | 0 | 0 |
| Incidence | Netherlands                      | Both | Age-standardized | Malaria | Rate | 2019 | 0 | 0 | 0 |
| Incidence | Brunei Darussalam                | Both | Age-standardized | Malaria | Rate | 2019 | 0 | 0 | 0 |
| Incidence | Morocco                          | Both | Age-standardized | Malaria | Rate | 2019 | 0 | 0 | 0 |
| Incidence | Japan                            | Both | Age-standardized | Malaria | Rate | 2019 | 0 | 0 | 0 |
| Incidence | Norway                           | Both | Age-standardized | Malaria | Rate | 2019 | 0 | 0 | 0 |
| Incidence | Cyprus                           | Both | Age-standardized | Malaria | Rate | 2019 | 0 | 0 | 0 |
| Incidence | Portugal                         | Both | Age-standardized | Malaria | Rate | 2019 | 0 | 0 | 0 |
| Incidence | Austria                          | Both | Age-standardized | Malaria | Rate | 2019 | 0 | 0 | 0 |

|           |                          |      |                  |         |      |      |   |   |   |
|-----------|--------------------------|------|------------------|---------|------|------|---|---|---|
| Incidence | Denmark                  | Both | Age-standardized | Malaria | Rate | 2019 | 0 | 0 | 0 |
| Incidence | Belgium                  | Both | Age-standardized | Malaria | Rate | 2019 | 0 | 0 | 0 |
| Incidence | Canada                   | Both | Age-standardized | Malaria | Rate | 2019 | 0 | 0 | 0 |
| Incidence | Costa Rica               | Both | Age-standardized | Malaria | Rate | 2019 | 0 | 0 | 0 |
| Incidence | United States of America | Both | Age-standardized | Malaria | Rate | 2019 | 0 | 0 | 0 |
| Incidence | Slovenia                 | Both | Age-standardized | Malaria | Rate | 2019 | 0 | 0 | 0 |
| Incidence | Albania                  | Both | Age-standardized | Malaria | Rate | 2019 | 0 | 0 | 0 |
| Incidence | Palestine                | Both | Age-standardized | Malaria | Rate | 2019 | 0 | 0 | 0 |
| Incidence | Puerto Rico              | Both | Age-standardized | Malaria | Rate | 2019 | 0 | 0 | 0 |
| Incidence | Paraguay                 | Both | Age-standardized | Malaria | Rate | 2019 | 0 | 0 | 0 |
| Incidence | Serbia                   | Both | Age-standardized | Malaria | Rate | 2019 | 0 | 0 | 0 |
| Incidence | Seychelles               | Both | Age-standardized | Malaria | Rate | 2019 | 0 | 0 | 0 |
| Incidence | Oman                     | Both | Age-standardized | Malaria | Rate | 2019 | 0 | 0 | 0 |
| Incidence | Saint Kitts and Nevis    | Both | Age-standardized | Malaria | Rate | 2019 | 0 | 0 | 0 |
| Incidence | Qatar                    | Both | Age-standardized | Malaria | Rate | 2019 | 0 | 0 | 0 |

|           |                          |      |                  |         |      |      |   |   |   |
|-----------|--------------------------|------|------------------|---------|------|------|---|---|---|
| Incidence | Slovakia                 | Both | Age-standardized | Malaria | Rate | 2019 | 0 | 0 | 0 |
| Incidence | Jordan                   | Both | Age-standardized | Malaria | Rate | 2019 | 0 | 0 | 0 |
| Incidence | Finland                  | Both | Age-standardized | Malaria | Rate | 2019 | 0 | 0 | 0 |
| Incidence | Mauritius                | Both | Age-standardized | Malaria | Rate | 2019 | 0 | 0 | 0 |
| Incidence | Kuwait                   | Both | Age-standardized | Malaria | Rate | 2019 | 0 | 0 | 0 |
| Incidence | Niue                     | Both | Age-standardized | Malaria | Rate | 2019 | 0 | 0 | 0 |
| Incidence | American Samoa           | Both | Age-standardized | Malaria | Rate | 2019 | 0 | 0 | 0 |
| Incidence | Lebanon                  | Both | Age-standardized | Malaria | Rate | 2019 | 0 | 0 | 0 |
| Incidence | Northern Mariana Islands | Both | Age-standardized | Malaria | Rate | 2019 | 0 | 0 | 0 |
| Incidence | Palau                    | Both | Age-standardized | Malaria | Rate | 2019 | 0 | 0 | 0 |

Appendix Table 2 age-standardized mortality rates of malaria for both sexes in 2019

| measure | location      | sex  | age              | cause   | metric | year | val    | upper  | lower |
|---------|---------------|------|------------------|---------|--------|------|--------|--------|-------|
| Deaths  | Sierra Leone  | Both | Age-standardized | Malaria | Rate   | 2019 | 162.53 | 290.56 | 61.69 |
| Deaths  | Cote d'Ivoire | Both | Age-standardized | Malaria | Rate   | 2019 | 143.45 | 268.08 | 67.72 |
| Deaths  | Liberia       | Both | Age-standardized | Malaria | Rate   | 2019 | 130.78 | 239.2  | 53.01 |
| Deaths  | Burkina Faso  | Both | Age-standardized | Malaria | Rate   | 2019 | 125.4  | 234.78 | 47.8  |

|        |                                  |      |                  |         |      |      |        |        |       |
|--------|----------------------------------|------|------------------|---------|------|------|--------|--------|-------|
| Deaths | Benin                            | Both | Age-standardized | Malaria | Rate | 2019 | 121.67 | 233.87 | 51.23 |
| Deaths | Nigeria                          | Both | Age-standardized | Malaria | Rate | 2019 | 112.34 | 210.49 | 51.9  |
| Deaths | Cameroon                         | Both | Age-standardized | Malaria | Rate | 2019 | 105.22 | 205.78 | 37.46 |
| Deaths | Niger                            | Both | Age-standardized | Malaria | Rate | 2019 | 102.88 | 215.02 | 34.15 |
| Deaths | Togo                             | Both | Age-standardized | Malaria | Rate | 2019 | 91.63  | 177.37 | 33.55 |
| Deaths | Mozambique                       | Both | Age-standardized | Malaria | Rate | 2019 | 88.04  | 175.63 | 35.38 |
| Deaths | Central African Republic         | Both | Age-standardized | Malaria | Rate | 2019 | 85.88  | 180.4  | 34.28 |
| Deaths | Guinea                           | Both | Age-standardized | Malaria | Rate | 2019 | 83.62  | 166.87 | 31.53 |
| Deaths | Ghana                            | Both | Age-standardized | Malaria | Rate | 2019 | 81.39  | 154.62 | 34.64 |
| Deaths | Equatorial Guinea                | Both | Age-standardized | Malaria | Rate | 2019 | 73.52  | 158.91 | 29.63 |
| Deaths | Mauritania                       | Both | Age-standardized | Malaria | Rate | 2019 | 71.8   | 203.54 | 6.21  |
| Deaths | Mali                             | Both | Age-standardized | Malaria | Rate | 2019 | 67.11  | 138.81 | 25.92 |
| Deaths | Senegal                          | Both | Age-standardized | Malaria | Rate | 2019 | 61.67  | 169.96 | 8.15  |
| Deaths | Democratic Republic of the Congo | Both | Age-standardized | Malaria | Rate | 2019 | 53.84  | 95.39  | 23.05 |
| Deaths | Chad                             | Both | Age-standardized | Malaria | Rate | 2019 | 48.88  | 116.4  | 14.48 |

|        |                             |      |                  |         |      |      |       |        |       |
|--------|-----------------------------|------|------------------|---------|------|------|-------|--------|-------|
| Deaths | Congo                       | Both | Age-standardized | Malaria | Rate | 2019 | 48.67 | 102.3  | 16.85 |
| Deaths | Burundi                     | Both | Age-standardized | Malaria | Rate | 2019 | 48.47 | 103.4  | 19.06 |
| Deaths | Gabon                       | Both | Age-standardized | Malaria | Rate | 2019 | 48.41 | 111.7  | 16.4  |
| Deaths | Gambia                      | Both | Age-standardized | Malaria | Rate | 2019 | 46.77 | 171.17 | 12.09 |
| Deaths | Uganda                      | Both | Age-standardized | Malaria | Rate | 2019 | 46.48 | 93.61  | 14.88 |
| Deaths | South Sudan                 | Both | Age-standardized | Malaria | Rate | 2019 | 44.68 | 86.92  | 14.48 |
| Deaths | Malawi                      | Both | Age-standardized | Malaria | Rate | 2019 | 43.82 | 88.31  | 16.98 |
| Deaths | Angola                      | Both | Age-standardized | Malaria | Rate | 2019 | 39.11 | 79.43  | 16.79 |
| Deaths | Guinea-Bissau               | Both | Age-standardized | Malaria | Rate | 2019 | 37.58 | 102.21 | 7.41  |
| Deaths | Zambia                      | Both | Age-standardized | Malaria | Rate | 2019 | 29.79 | 66.76  | 8.24  |
| Deaths | Rwanda                      | Both | Age-standardized | Malaria | Rate | 2019 | 28.34 | 64.27  | 9.66  |
| Deaths | Comoros                     | Both | Age-standardized | Malaria | Rate | 2019 | 27.42 | 128.37 | 0.65  |
| Deaths | Madagascar                  | Both | Age-standardized | Malaria | Rate | 2019 | 25.86 | 57.8   | 8.17  |
| Deaths | Solomon Islands             | Both | Age-standardized | Malaria | Rate | 2019 | 25.64 | 71.46  | 5.7   |
| Deaths | United Republic of Tanzania | Both | Age-standardized | Malaria | Rate | 2019 | 24.6  | 51.37  | 9.02  |

|        |                                    |      |                  |         |      |      |       |       |      |
|--------|------------------------------------|------|------------------|---------|------|------|-------|-------|------|
| Deaths | Yemen                              | Both | Age-standardized | Malaria | Rate | 2019 | 21.93 | 72.56 | 1.91 |
| Deaths | Somalia                            | Both | Age-standardized | Malaria | Rate | 2019 | 20.8  | 54.16 | 6.48 |
| Deaths | Kenya                              | Both | Age-standardized | Malaria | Rate | 2019 | 18    | 38.94 | 5.95 |
| Deaths | Zimbabwe                           | Both | Age-standardized | Malaria | Rate | 2019 | 11.81 | 33.93 | 1.32 |
| Deaths | Papua New Guinea                   | Both | Age-standardized | Malaria | Rate | 2019 | 11.07 | 32.79 | 2.03 |
| Deaths | Djibouti                           | Both | Age-standardized | Malaria | Rate | 2019 | 9.53  | 68.55 | 0.08 |
| Deaths | Ethiopia                           | Both | Age-standardized | Malaria | Rate | 2019 | 9.12  | 24.43 | 1.77 |
| Deaths | Namibia                            | Both | Age-standardized | Malaria | Rate | 2019 | 8.35  | 45.85 | 0.34 |
| Deaths | Sao Tome and Principe              | Both | Age-standardized | Malaria | Rate | 2019 | 6.35  | 14.7  | 1.83 |
| Deaths | Sudan                              | Both | Age-standardized | Malaria | Rate | 2019 | 6.15  | 15.45 | 1.99 |
| Deaths | Eritrea                            | Both | Age-standardized | Malaria | Rate | 2019 | 6.02  | 21.6  | 1.07 |
| Deaths | Haiti                              | Both | Age-standardized | Malaria | Rate | 2019 | 4.02  | 13    | 0.52 |
| Deaths | India                              | Both | Age-standardized | Malaria | Rate | 2019 | 2.61  | 6.67  | 0.93 |
| Deaths | Venezuela (Bolivarian Republic of) | Both | Age-standardized | Malaria | Rate | 2019 | 2.36  | 6.71  | 0.49 |
| Deaths | Guyana                             | Both | Age-standardized | Malaria | Rate | 2019 | 2.18  | 8.46  | 0.25 |

|        |                                  |      |                  |         |      |      |      |      |      |
|--------|----------------------------------|------|------------------|---------|------|------|------|------|------|
| Deaths | Pakistan                         | Both | Age-standardized | Malaria | Rate | 2019 | 1.81 | 4.73 | 0.48 |
| Deaths | Afghanistan                      | Both | Age-standardized | Malaria | Rate | 2019 | 1.66 | 6.34 | 0.08 |
| Deaths | Cabo Verde                       | Both | Age-standardized | Malaria | Rate | 2019 | 1.66 | 10.5 | 0    |
| Deaths | South Africa                     | Both | Age-standardized | Malaria | Rate | 2019 | 0.8  | 7.08 | 0.02 |
| Deaths | Eswatini                         | Both | Age-standardized | Malaria | Rate | 2019 | 0.8  | 2.82 | 0    |
| Deaths | Vanuatu                          | Both | Age-standardized | Malaria | Rate | 2019 | 0.7  | 2.81 | 0.08 |
| Deaths | Botswana                         | Both | Age-standardized | Malaria | Rate | 2019 | 0.63 | 1.8  | 0.11 |
| Deaths | Myanmar                          | Both | Age-standardized | Malaria | Rate | 2019 | 0.55 | 3.13 | 0    |
| Deaths | Cambodia                         | Both | Age-standardized | Malaria | Rate | 2019 | 0.36 | 0.99 | 0.06 |
| Deaths | Lao People's Democratic Republic | Both | Age-standardized | Malaria | Rate | 2019 | 0.34 | 0.93 | 0.08 |
| Deaths | Indonesia                        | Both | Age-standardized | Malaria | Rate | 2019 | 0.25 | 0.72 | 0.06 |
| Deaths | Colombia                         | Both | Age-standardized | Malaria | Rate | 2019 | 0.12 | 0.33 | 0.01 |
| Deaths | Bangladesh                       | Both | Age-standardized | Malaria | Rate | 2019 | 0.07 | 0.42 | 0    |
| Deaths | Suriname                         | Both | Age-standardized | Malaria | Rate | 2019 | 0.07 | 0.45 | 0    |
| Deaths | Viet Nam                         | Both | Age-standardized | Malaria | Rate | 2019 | 0.06 | 0.14 | 0.01 |

|        |                                       |      |                  |         |      |      |      |      |      |
|--------|---------------------------------------|------|------------------|---------|------|------|------|------|------|
| Deaths | Nicaragua                             | Both | Age-standardized | Malaria | Rate | 2019 | 0.06 | 0.23 | 0    |
| Deaths | Peru                                  | Both | Age-standardized | Malaria | Rate | 2019 | 0.06 | 0.32 | 0    |
| Deaths | Brazil                                | Both | Age-standardized | Malaria | Rate | 2019 | 0.06 | 0.15 | 0.01 |
| Deaths | Dominican Republic                    | Both | Age-standardized | Malaria | Rate | 2019 | 0.05 | 0.18 | 0.01 |
| Deaths | Philippines                           | Both | Age-standardized | Malaria | Rate | 2019 | 0.04 | 0.14 | 0.01 |
| Deaths | Malaysia                              | Both | Age-standardized | Malaria | Rate | 2019 | 0.02 | 0.05 | 0    |
| Deaths | Honduras                              | Both | Age-standardized | Malaria | Rate | 2019 | 0.01 | 0.04 | 0    |
| Deaths | Democratic People's Republic of Korea | Both | Age-standardized | Malaria | Rate | 2019 | 0.01 | 0.01 | 0.01 |
| Deaths | El Salvador                           | Both | Age-standardized | Malaria | Rate | 2019 | 0.01 | 0.01 | 0.01 |
| Deaths | Timor-Leste                           | Both | Age-standardized | Malaria | Rate | 2019 | 0.01 | 0.02 | 0    |
| Deaths | Ecuador                               | Both | Age-standardized | Malaria | Rate | 2019 | 0.01 | 0.03 | 0    |
| Deaths | Saudi Arabia                          | Both | Age-standardized | Malaria | Rate | 2019 | 0    | 0.01 | 0    |
| Deaths | Nepal                                 | Both | Age-standardized | Malaria | Rate | 2019 | 0    | 0.02 | 0    |
| Deaths | Republic of Korea                     | Both | Age-standardized | Malaria | Rate | 2019 | 0    | 0    | 0    |
| Deaths | Thailand                              | Both | Age-standardized | Malaria | Rate | 2019 | 0    | 0    | 0    |

|        |                            |      |                  |         |      |      |   |      |   |
|--------|----------------------------|------|------------------|---------|------|------|---|------|---|
| Deaths | Guatemala                  | Both | Age-standardized | Malaria | Rate | 2019 | 0 | 0    | 0 |
| Deaths | Panama                     | Both | Age-standardized | Malaria | Rate | 2019 | 0 | 0.01 | 0 |
| Deaths | Mexico                     | Both | Age-standardized | Malaria | Rate | 2019 | 0 | 0    | 0 |
| Deaths | Algeria                    | Both | Age-standardized | Malaria | Rate | 2019 | 0 | 0    | 0 |
| Deaths | Iran (Islamic Republic of) | Both | Age-standardized | Malaria | Rate | 2019 | 0 | 0    | 0 |
| Deaths | Czechia                    | Both | Age-standardized | Malaria | Rate | 2019 | 0 | 0    | 0 |
| Deaths | Costa Rica                 | Both | Age-standardized | Malaria | Rate | 2019 | 0 | 0    | 0 |
| Deaths | Switzerland                | Both | Age-standardized | Malaria | Rate | 2019 | 0 | 0    | 0 |
| Deaths | Ukraine                    | Both | Age-standardized | Malaria | Rate | 2019 | 0 | 0    | 0 |
| Deaths | United Kingdom             | Both | Age-standardized | Malaria | Rate | 2019 | 0 | 0    | 0 |
| Deaths | Finland                    | Both | Age-standardized | Malaria | Rate | 2019 | 0 | 0    | 0 |
| Deaths | Dominica                   | Both | Age-standardized | Malaria | Rate | 2019 | 0 | 0    | 0 |
| Deaths | Saint Kitts and Nevis      | Both | Age-standardized | Malaria | Rate | 2019 | 0 | 0    | 0 |
| Deaths | Hungary                    | Both | Age-standardized | Malaria | Rate | 2019 | 0 | 0    | 0 |
| Deaths | Iraq                       | Both | Age-standardized | Malaria | Rate | 2019 | 0 | 0    | 0 |

|        |                   |      |                  |         |      |      |   |   |   |
|--------|-------------------|------|------------------|---------|------|------|---|---|---|
| Deaths | San Marino        | Both | Age-standardized | Malaria | Rate | 2019 | 0 | 0 | 0 |
| Deaths | Sri Lanka         | Both | Age-standardized | Malaria | Rate | 2019 | 0 | 0 | 0 |
| Deaths | France            | Both | Age-standardized | Malaria | Rate | 2019 | 0 | 0 | 0 |
| Deaths | Azerbaijan        | Both | Age-standardized | Malaria | Rate | 2019 | 0 | 0 | 0 |
| Deaths | Grenada           | Both | Age-standardized | Malaria | Rate | 2019 | 0 | 0 | 0 |
| Deaths | Armenia           | Both | Age-standardized | Malaria | Rate | 2019 | 0 | 0 | 0 |
| Deaths | Bermuda           | Both | Age-standardized | Malaria | Rate | 2019 | 0 | 0 | 0 |
| Deaths | Argentina         | Both | Age-standardized | Malaria | Rate | 2019 | 0 | 0 | 0 |
| Deaths | Brunei Darussalam | Both | Age-standardized | Malaria | Rate | 2019 | 0 | 0 | 0 |
| Deaths | Tokelau           | Both | Age-standardized | Malaria | Rate | 2019 | 0 | 0 | 0 |
| Deaths | North Macedonia   | Both | Age-standardized | Malaria | Rate | 2019 | 0 | 0 | 0 |
| Deaths | Montenegro        | Both | Age-standardized | Malaria | Rate | 2019 | 0 | 0 | 0 |
| Deaths | Greece            | Both | Age-standardized | Malaria | Rate | 2019 | 0 | 0 | 0 |
| Deaths | Kuwait            | Both | Age-standardized | Malaria | Rate | 2019 | 0 | 0 | 0 |
| Deaths | Tuvalu            | Both | Age-standardized | Malaria | Rate | 2019 | 0 | 0 | 0 |

|        |                              |      |                  |         |      |      |   |   |   |
|--------|------------------------------|------|------------------|---------|------|------|---|---|---|
| Deaths | Jordan                       | Both | Age-standardized | Malaria | Rate | 2019 | 0 | 0 | 0 |
| Deaths | Lesotho                      | Both | Age-standardized | Malaria | Rate | 2019 | 0 | 0 | 0 |
| Deaths | Georgia                      | Both | Age-standardized | Malaria | Rate | 2019 | 0 | 0 | 0 |
| Deaths | American Samoa               | Both | Age-standardized | Malaria | Rate | 2019 | 0 | 0 | 0 |
| Deaths | Bhutan                       | Both | Age-standardized | Malaria | Rate | 2019 | 0 | 0 | 0 |
| Deaths | Japan                        | Both | Age-standardized | Malaria | Rate | 2019 | 0 | 0 | 0 |
| Deaths | China                        | Both | Age-standardized | Malaria | Rate | 2019 | 0 | 0 | 0 |
| Deaths | Uruguay                      | Both | Age-standardized | Malaria | Rate | 2019 | 0 | 0 | 0 |
| Deaths | Lebanon                      | Both | Age-standardized | Malaria | Rate | 2019 | 0 | 0 | 0 |
| Deaths | Kazakhstan                   | Both | Age-standardized | Malaria | Rate | 2019 | 0 | 0 | 0 |
| Deaths | Poland                       | Both | Age-standardized | Malaria | Rate | 2019 | 0 | 0 | 0 |
| Deaths | Iceland                      | Both | Age-standardized | Malaria | Rate | 2019 | 0 | 0 | 0 |
| Deaths | Kyrgyzstan                   | Both | Age-standardized | Malaria | Rate | 2019 | 0 | 0 | 0 |
| Deaths | United States Virgin Islands | Both | Age-standardized | Malaria | Rate | 2019 | 0 | 0 | 0 |
| Deaths | Mongolia                     | Both | Age-standardized | Malaria | Rate | 2019 | 0 | 0 | 0 |

|        |                               |      |                  |         |      |      |   |   |   |
|--------|-------------------------------|------|------------------|---------|------|------|---|---|---|
| Deaths | Cook Islands                  | Both | Age-standardized | Malaria | Rate | 2019 | 0 | 0 | 0 |
| Deaths | Romania                       | Both | Age-standardized | Malaria | Rate | 2019 | 0 | 0 | 0 |
| Deaths | Chile                         | Both | Age-standardized | Malaria | Rate | 2019 | 0 | 0 | 0 |
| Deaths | Taiwan<br>(Province of China) | Both | Age-standardized | Malaria | Rate | 2019 | 0 | 0 | 0 |
| Deaths | Germany                       | Both | Age-standardized | Malaria | Rate | 2019 | 0 | 0 | 0 |
| Deaths | Libya                         | Both | Age-standardized | Malaria | Rate | 2019 | 0 | 0 | 0 |
| Deaths | United States of America      | Both | Age-standardized | Malaria | Rate | 2019 | 0 | 0 | 0 |
| Deaths | Israel                        | Both | Age-standardized | Malaria | Rate | 2019 | 0 | 0 | 0 |
| Deaths | Morocco                       | Both | Age-standardized | Malaria | Rate | 2019 | 0 | 0 | 0 |
| Deaths | Fiji                          | Both | Age-standardized | Malaria | Rate | 2019 | 0 | 0 | 0 |
| Deaths | Jamaica                       | Both | Age-standardized | Malaria | Rate | 2019 | 0 | 0 | 0 |
| Deaths | Australia                     | Both | Age-standardized | Malaria | Rate | 2019 | 0 | 0 | 0 |
| Deaths | Greenland                     | Both | Age-standardized | Malaria | Rate | 2019 | 0 | 0 | 0 |
| Deaths | Singapore                     | Both | Age-standardized | Malaria | Rate | 2019 | 0 | 0 | 0 |
| Deaths | Ireland                       | Both | Age-standardized | Malaria | Rate | 2019 | 0 | 0 | 0 |

|        |                                  |      |                  |         |      |      |   |   |   |
|--------|----------------------------------|------|------------------|---------|------|------|---|---|---|
| Deaths | Tajikistan                       | Both | Age-standardized | Malaria | Rate | 2019 | 0 | 0 | 0 |
| Deaths | Slovakia                         | Both | Age-standardized | Malaria | Rate | 2019 | 0 | 0 | 0 |
| Deaths | Serbia                           | Both | Age-standardized | Malaria | Rate | 2019 | 0 | 0 | 0 |
| Deaths | Italy                            | Both | Age-standardized | Malaria | Rate | 2019 | 0 | 0 | 0 |
| Deaths | Marshall Islands                 | Both | Age-standardized | Malaria | Rate | 2019 | 0 | 0 | 0 |
| Deaths | Belarus                          | Both | Age-standardized | Malaria | Rate | 2019 | 0 | 0 | 0 |
| Deaths | Uzbekistan                       | Both | Age-standardized | Malaria | Rate | 2019 | 0 | 0 | 0 |
| Deaths | Oman                             | Both | Age-standardized | Malaria | Rate | 2019 | 0 | 0 | 0 |
| Deaths | Antigua and Barbuda              | Both | Age-standardized | Malaria | Rate | 2019 | 0 | 0 | 0 |
| Deaths | Saint Vincent and the Grenadines | Both | Age-standardized | Malaria | Rate | 2019 | 0 | 0 | 0 |
| Deaths | Slovenia                         | Both | Age-standardized | Malaria | Rate | 2019 | 0 | 0 | 0 |
| Deaths | Guam                             | Both | Age-standardized | Malaria | Rate | 2019 | 0 | 0 | 0 |
| Deaths | Mauritius                        | Both | Age-standardized | Malaria | Rate | 2019 | 0 | 0 | 0 |
| Deaths | Kiribati                         | Both | Age-standardized | Malaria | Rate | 2019 | 0 | 0 | 0 |
| Deaths | Monaco                           | Both | Age-standardized | Malaria | Rate | 2019 | 0 | 0 | 0 |

|        |                                  |      |                  |         |      |      |   |   |   |
|--------|----------------------------------|------|------------------|---------|------|------|---|---|---|
| Deaths | Saint Lucia                      | Both | Age-standardized | Malaria | Rate | 2019 | 0 | 0 | 0 |
| Deaths | Trinidad and Tobago              | Both | Age-standardized | Malaria | Rate | 2019 | 0 | 0 | 0 |
| Deaths | Nauru                            | Both | Age-standardized | Malaria | Rate | 2019 | 0 | 0 | 0 |
| Deaths | Qatar                            | Both | Age-standardized | Malaria | Rate | 2019 | 0 | 0 | 0 |
| Deaths | Canada                           | Both | Age-standardized | Malaria | Rate | 2019 | 0 | 0 | 0 |
| Deaths | Paraguay                         | Both | Age-standardized | Malaria | Rate | 2019 | 0 | 0 | 0 |
| Deaths | Turkmenistan                     | Both | Age-standardized | Malaria | Rate | 2019 | 0 | 0 | 0 |
| Deaths | Malta                            | Both | Age-standardized | Malaria | Rate | 2019 | 0 | 0 | 0 |
| Deaths | New Zealand                      | Both | Age-standardized | Malaria | Rate | 2019 | 0 | 0 | 0 |
| Deaths | Palestine                        | Both | Age-standardized | Malaria | Rate | 2019 | 0 | 0 | 0 |
| Deaths | Bolivia (Plurinational State of) | Both | Age-standardized | Malaria | Rate | 2019 | 0 | 0 | 0 |
| Deaths | Belize                           | Both | Age-standardized | Malaria | Rate | 2019 | 0 | 0 | 0 |
| Deaths | Netherlands                      | Both | Age-standardized | Malaria | Rate | 2019 | 0 | 0 | 0 |
| Deaths | Bahamas                          | Both | Age-standardized | Malaria | Rate | 2019 | 0 | 0 | 0 |
| Deaths | Niue                             | Both | Age-standardized | Malaria | Rate | 2019 | 0 | 0 | 0 |

|        |                                  |      |                  |         |      |      |   |   |   |
|--------|----------------------------------|------|------------------|---------|------|------|---|---|---|
| Deaths | Lithuania                        | Both | Age-standardized | Malaria | Rate | 2019 | 0 | 0 | 0 |
| Deaths | Micronesia (Federated States of) | Both | Age-standardized | Malaria | Rate | 2019 | 0 | 0 | 0 |
| Deaths | Belgium                          | Both | Age-standardized | Malaria | Rate | 2019 | 0 | 0 | 0 |
| Deaths | Estonia                          | Both | Age-standardized | Malaria | Rate | 2019 | 0 | 0 | 0 |
| Deaths | Northern Mariana Islands         | Both | Age-standardized | Malaria | Rate | 2019 | 0 | 0 | 0 |
| Deaths | Barbados                         | Both | Age-standardized | Malaria | Rate | 2019 | 0 | 0 | 0 |
| Deaths | Syrian Arab Republic             | Both | Age-standardized | Malaria | Rate | 2019 | 0 | 0 | 0 |
| Deaths | Luxembourg                       | Both | Age-standardized | Malaria | Rate | 2019 | 0 | 0 | 0 |
| Deaths | Andorra                          | Both | Age-standardized | Malaria | Rate | 2019 | 0 | 0 | 0 |
| Deaths | Bosnia and Herzegovina           | Both | Age-standardized | Malaria | Rate | 2019 | 0 | 0 | 0 |
| Deaths | Egypt                            | Both | Age-standardized | Malaria | Rate | 2019 | 0 | 0 | 0 |
| Deaths | Albania                          | Both | Age-standardized | Malaria | Rate | 2019 | 0 | 0 | 0 |
| Deaths | Palau                            | Both | Age-standardized | Malaria | Rate | 2019 | 0 | 0 | 0 |
| Deaths | Spain                            | Both | Age-standardized | Malaria | Rate | 2019 | 0 | 0 | 0 |
| Deaths | Seychelles                       | Both | Age-standardized | Malaria | Rate | 2019 | 0 | 0 | 0 |

|        |                     |      |                  |         |      |      |   |   |   |
|--------|---------------------|------|------------------|---------|------|------|---|---|---|
| Deaths | Bulgaria            | Both | Age-standardized | Malaria | Rate | 2019 | 0 | 0 | 0 |
| Deaths | Puerto Rico         | Both | Age-standardized | Malaria | Rate | 2019 | 0 | 0 | 0 |
| Deaths | Denmark             | Both | Age-standardized | Malaria | Rate | 2019 | 0 | 0 | 0 |
| Deaths | Tunisia             | Both | Age-standardized | Malaria | Rate | 2019 | 0 | 0 | 0 |
| Deaths | Tonga               | Both | Age-standardized | Malaria | Rate | 2019 | 0 | 0 | 0 |
| Deaths | Norway              | Both | Age-standardized | Malaria | Rate | 2019 | 0 | 0 | 0 |
| Deaths | Republic of Moldova | Both | Age-standardized | Malaria | Rate | 2019 | 0 | 0 | 0 |
| Deaths | Cuba                | Both | Age-standardized | Malaria | Rate | 2019 | 0 | 0 | 0 |
| Deaths | Turkey              | Both | Age-standardized | Malaria | Rate | 2019 | 0 | 0 | 0 |
| Deaths | Cyprus              | Both | Age-standardized | Malaria | Rate | 2019 | 0 | 0 | 0 |
| Deaths | Sweden              | Both | Age-standardized | Malaria | Rate | 2019 | 0 | 0 | 0 |
| Deaths | Portugal            | Both | Age-standardized | Malaria | Rate | 2019 | 0 | 0 | 0 |
| Deaths | Samoa               | Both | Age-standardized | Malaria | Rate | 2019 | 0 | 0 | 0 |
| Deaths | Maldives            | Both | Age-standardized | Malaria | Rate | 2019 | 0 | 0 | 0 |
| Deaths | Austria             | Both | Age-standardized | Malaria | Rate | 2019 | 0 | 0 | 0 |

|        |                      |      |                  |         |      |      |   |   |   |
|--------|----------------------|------|------------------|---------|------|------|---|---|---|
| Deaths | United Arab Emirates | Both | Age-standardized | Malaria | Rate | 2019 | 0 | 0 | 0 |
| Deaths | Latvia               | Both | Age-standardized | Malaria | Rate | 2019 | 0 | 0 | 0 |
| Deaths | Croatia              | Both | Age-standardized | Malaria | Rate | 2019 | 0 | 0 | 0 |
| Deaths | Russian Federation   | Both | Age-standardized | Malaria | Rate | 2019 | 0 | 0 | 0 |
| Deaths | Bahrain              | Both | Age-standardized | Malaria | Rate | 2019 | 0 | 0 | 0 |

Appendix Table 3 age-standardized DALYs rates of malaria for both sexes in 2019

| measure                                   | location      | sex  | age              | cause   | metric | year | val    | upper   | lower  |
|-------------------------------------------|---------------|------|------------------|---------|--------|------|--------|---------|--------|
| DALYs<br>(Disability-Adjusted Life Years) | Sierra Leone  | Both | Age-standardized | Malaria | Rate   | 2019 | 8615   | 14846.9 | 3642.3 |
| DALYs<br>(Disability-Adjusted Life Years) | Cote d'Ivoire | Both | Age-standardized | Malaria | Rate   | 2019 | 6871.7 | 11949.6 | 3576.5 |
| DALYs<br>(Disability-Adjusted Life Years) | Burkina Faso  | Both | Age-standardized | Malaria | Rate   | 2019 | 6551.9 | 11739.4 | 2810   |
| DALYs<br>(Disability-Adjusted Life Years) | Liberia       | Both | Age-standardized | Malaria | Rate   | 2019 | 6271.9 | 10842.3 | 2818.2 |
| DALYs<br>(Disability-Adjusted Life Years) | Benin         | Both | Age-standardized | Malaria | Rate   | 2019 | 6112.7 | 10934.8 | 2802.6 |

|                                                     |                                |      |                      |         |      |      |        |         |        |
|-----------------------------------------------------|--------------------------------|------|----------------------|---------|------|------|--------|---------|--------|
| DALYs<br>(Disability<br>-Adjusted<br>Life<br>Years) | Nigeria                        | Both | Age-<br>standardized | Malaria | Rate | 2019 | 5422.4 | 9784.8  | 2704.4 |
| DALYs<br>(Disability<br>-Adjusted<br>Life<br>Years) | Niger                          | Both | Age-<br>standardized | Malaria | Rate | 2019 | 5408.7 | 10826.4 | 2025.7 |
| DALYs<br>(Disability<br>-Adjusted<br>Life<br>Years) | Guinea                         | Both | Age-<br>standardized | Malaria | Rate | 2019 | 5089.1 | 9587.9  | 2189.3 |
| DALYs<br>(Disability<br>-Adjusted<br>Life<br>Years) | Cameroon                       | Both | Age-<br>standardized | Malaria | Rate | 2019 | 4872   | 9073.3  | 1950.3 |
| DALYs<br>(Disability<br>-Adjusted<br>Life<br>Years) | Central<br>African<br>Republic | Both | Age-<br>standardized | Malaria | Rate | 2019 | 4821.1 | 9882.5  | 2029.3 |
| DALYs<br>(Disability<br>-Adjusted<br>Life<br>Years) | Ghana                          | Both | Age-<br>standardized | Malaria | Rate | 2019 | 4327.7 | 7731.6  | 1993.2 |
| DALYs<br>(Disability<br>-Adjusted<br>Life<br>Years) | Mozambique                     | Both | Age-<br>standardized | Malaria | Rate | 2019 | 4305.6 | 8160.7  | 1898.3 |
| DALYs<br>(Disability<br>-Adjusted<br>Life<br>Years) | Togo                           | Both | Age-<br>standardized | Malaria | Rate | 2019 | 4278.6 | 8183.5  | 1816.6 |
| DALYs<br>(Disability<br>-Adjusted<br>Life<br>Years) | Mali                           | Both | Age-<br>standardized | Malaria | Rate | 2019 | 4263.1 | 8254.3  | 1764.6 |

|                                                     |                                        |      |                      |         |      |      |        |        |        |
|-----------------------------------------------------|----------------------------------------|------|----------------------|---------|------|------|--------|--------|--------|
| DALYs<br>(Disability<br>-Adjusted<br>Life<br>Years) | Democratic<br>Republic of<br>the Congo | Both | Age-<br>standardized | Malaria | Rate | 2019 | 3968.1 | 6545.3 | 1937.8 |
| DALYs<br>(Disability<br>-Adjusted<br>Life<br>Years) | Equatorial<br>Guinea                   | Both | Age-<br>standardized | Malaria | Rate | 2019 | 3921.8 | 7706   | 1827.1 |
| DALYs<br>(Disability<br>-Adjusted<br>Life<br>Years) | Burundi                                | Both | Age-<br>standardized | Malaria | Rate | 2019 | 3402.9 | 6801.1 | 1441.7 |
| DALYs<br>(Disability<br>-Adjusted<br>Life<br>Years) | Uganda                                 | Both | Age-<br>standardized | Malaria | Rate | 2019 | 3186.5 | 5824.7 | 1278.6 |
| DALYs<br>(Disability<br>-Adjusted<br>Life<br>Years) | South Sudan                            | Both | Age-<br>standardized | Malaria | Rate | 2019 | 3108.9 | 5825.2 | 1131.7 |
| DALYs<br>(Disability<br>-Adjusted<br>Life<br>Years) | Mauritania                             | Both | Age-<br>standardized | Malaria | Rate | 2019 | 2853.1 | 7685.2 | 371.5  |
| DALYs<br>(Disability<br>-Adjusted<br>Life<br>Years) | Gabon                                  | Both | Age-<br>standardized | Malaria | Rate | 2019 | 2585.1 | 5309   | 999.4  |
| DALYs<br>(Disability<br>-Adjusted<br>Life<br>Years) | Malawi                                 | Both | Age-<br>standardized | Malaria | Rate | 2019 | 2544.9 | 4856.7 | 1158.9 |
| DALYs<br>(Disability<br>-Adjusted<br>Life<br>Years) | Senegal                                | Both | Age-<br>standardized | Malaria | Rate | 2019 | 2543.6 | 6660   | 402.3  |

|                                                     |                                   |      |                      |         |      |      |        |        |        |
|-----------------------------------------------------|-----------------------------------|------|----------------------|---------|------|------|--------|--------|--------|
| DALYs<br>(Disability<br>-Adjusted<br>Life<br>Years) | Congo                             | Both | Age-<br>standardized | Malaria | Rate | 2019 | 2537   | 4918.7 | 1014.4 |
| DALYs<br>(Disability<br>-Adjusted<br>Life<br>Years) | Chad                              | Both | Age-<br>standardized | Malaria | Rate | 2019 | 2438   | 5487   | 807.3  |
| DALYs<br>(Disability<br>-Adjusted<br>Life<br>Years) | Angola                            | Both | Age-<br>standardized | Malaria | Rate | 2019 | 2155.6 | 4116.3 | 993.7  |
| DALYs<br>(Disability<br>-Adjusted<br>Life<br>Years) | Guinea-<br>Bissau                 | Both | Age-<br>standardized | Malaria | Rate | 2019 | 1923.5 | 5024.5 | 440.9  |
| DALYs<br>(Disability<br>-Adjusted<br>Life<br>Years) | Gambia                            | Both | Age-<br>standardized | Malaria | Rate | 2019 | 1761.7 | 5969.7 | 512.2  |
| DALYs<br>(Disability<br>-Adjusted<br>Life<br>Years) | Rwanda                            | Both | Age-<br>standardized | Malaria | Rate | 2019 | 1739.5 | 3784.7 | 647.9  |
| DALYs<br>(Disability<br>-Adjusted<br>Life<br>Years) | United<br>Republic of<br>Tanzania | Both | Age-<br>standardized | Malaria | Rate | 2019 | 1718   | 3361.6 | 720.2  |
| DALYs<br>(Disability<br>-Adjusted<br>Life<br>Years) | Zambia                            | Both | Age-<br>standardized | Malaria | Rate | 2019 | 1705.9 | 3520.9 | 605.4  |
| DALYs<br>(Disability<br>-Adjusted<br>Life<br>Years) | Madagascar                        | Both | Age-<br>standardized | Malaria | Rate | 2019 | 1394.8 | 3006.5 | 515.4  |

|                                                     |                     |      |                      |         |      |      |        |        |       |
|-----------------------------------------------------|---------------------|------|----------------------|---------|------|------|--------|--------|-------|
| DALYs<br>(Disability<br>-Adjusted<br>Life<br>Years) | Comoros             | Both | Age-<br>standardized | Malaria | Rate | 2019 | 1306.1 | 5714.6 | 81.8  |
| DALYs<br>(Disability<br>-Adjusted<br>Life<br>Years) | Somalia             | Both | Age-<br>standardized | Malaria | Rate | 2019 | 1140.3 | 2820.7 | 412.4 |
| DALYs<br>(Disability<br>-Adjusted<br>Life<br>Years) | Kenya               | Both | Age-<br>standardized | Malaria | Rate | 2019 | 1091.8 | 2158.7 | 436.3 |
| DALYs<br>(Disability<br>-Adjusted<br>Life<br>Years) | Yemen               | Both | Age-<br>standardized | Malaria | Rate | 2019 | 970.5  | 2959.2 | 110.3 |
| DALYs<br>(Disability<br>-Adjusted<br>Life<br>Years) | Zimbabwe            | Both | Age-<br>standardized | Malaria | Rate | 2019 | 850.2  | 2335.4 | 127.5 |
| DALYs<br>(Disability<br>-Adjusted<br>Life<br>Years) | Solomon<br>Islands  | Both | Age-<br>standardized | Malaria | Rate | 2019 | 779.2  | 2064.4 | 200.8 |
| DALYs<br>(Disability<br>-Adjusted<br>Life<br>Years) | Ethiopia            | Both | Age-<br>standardized | Malaria | Rate | 2019 | 738.9  | 1870.5 | 186.2 |
| DALYs<br>(Disability<br>-Adjusted<br>Life<br>Years) | Papua New<br>Guinea | Both | Age-<br>standardized | Malaria | Rate | 2019 | 587.7  | 1596.8 | 157.7 |
| DALYs<br>(Disability<br>-Adjusted<br>Life<br>Years) | Namibia             | Both | Age-<br>standardized | Malaria | Rate | 2019 | 511.6  | 2485.5 | 40.8  |

|                                                     |                                          |      |                      |         |      |      |       |        |       |
|-----------------------------------------------------|------------------------------------------|------|----------------------|---------|------|------|-------|--------|-------|
| DALYs<br>(Disability<br>-Adjusted<br>Life<br>Years) | Djibouti                                 | Both | Age-<br>standardized | Malaria | Rate | 2019 | 469.9 | 3174.3 | 24.3  |
| DALYs<br>(Disability<br>-Adjusted<br>Life<br>Years) | Sao Tome<br>and Principe                 | Both | Age-<br>standardized | Malaria | Rate | 2019 | 462.9 | 1011.4 | 167   |
| DALYs<br>(Disability<br>-Adjusted<br>Life<br>Years) | Sudan                                    | Both | Age-<br>standardized | Malaria | Rate | 2019 | 374.2 | 854.3  | 136.8 |
| DALYs<br>(Disability<br>-Adjusted<br>Life<br>Years) | Eritrea                                  | Both | Age-<br>standardized | Malaria | Rate | 2019 | 320.3 | 1069.6 | 81    |
| DALYs<br>(Disability<br>-Adjusted<br>Life<br>Years) | Haiti                                    | Both | Age-<br>standardized | Malaria | Rate | 2019 | 205.9 | 658.8  | 30.4  |
| DALYs<br>(Disability<br>-Adjusted<br>Life<br>Years) | India                                    | Both | Age-<br>standardized | Malaria | Rate | 2019 | 171.9 | 395.7  | 69.9  |
| DALYs<br>(Disability<br>-Adjusted<br>Life<br>Years) | Venezuela<br>(Bolivarian<br>Republic of) | Both | Age-<br>standardized | Malaria | Rate | 2019 | 147.6 | 391.4  | 40    |
| DALYs<br>(Disability<br>-Adjusted<br>Life<br>Years) | Cabo Verde                               | Both | Age-<br>standardized | Malaria | Rate | 2019 | 141.2 | 765.9  | 22.7  |
| DALYs<br>(Disability<br>-Adjusted<br>Life<br>Years) | Guyana                                   | Both | Age-<br>standardized | Malaria | Rate | 2019 | 139.7 | 481.7  | 33.4  |

|                                                     |                                        |      |                      |         |      |      |       |       |      |
|-----------------------------------------------------|----------------------------------------|------|----------------------|---------|------|------|-------|-------|------|
| DALYs<br>(Disability<br>-Adjusted<br>Life<br>Years) | Pakistan                               | Both | Age-<br>standardized | Malaria | Rate | 2019 | 114.1 | 273   | 37.8 |
| DALYs<br>(Disability<br>-Adjusted<br>Life<br>Years) | Afghanistan                            | Both | Age-<br>standardized | Malaria | Rate | 2019 | 94.3  | 328.8 | 13.1 |
| DALYs<br>(Disability<br>-Adjusted<br>Life<br>Years) | Eswatini                               | Both | Age-<br>standardized | Malaria | Rate | 2019 | 58    | 180.7 | 8    |
| DALYs<br>(Disability<br>-Adjusted<br>Life<br>Years) | Botswana                               | Both | Age-<br>standardized | Malaria | Rate | 2019 | 48.5  | 119.7 | 16   |
| DALYs<br>(Disability<br>-Adjusted<br>Life<br>Years) | South Africa                           | Both | Age-<br>standardized | Malaria | Rate | 2019 | 45.2  | 359.8 | 3.4  |
| DALYs<br>(Disability<br>-Adjusted<br>Life<br>Years) | Myanmar                                | Both | Age-<br>standardized | Malaria | Rate | 2019 | 34.3  | 183   | 1.5  |
| DALYs<br>(Disability<br>-Adjusted<br>Life<br>Years) | Vanuatu                                | Both | Age-<br>standardized | Malaria | Rate | 2019 | 31.7  | 96.4  | 11.6 |
| DALYs<br>(Disability<br>-Adjusted<br>Life<br>Years) | Cambodia                               | Both | Age-<br>standardized | Malaria | Rate | 2019 | 27.4  | 62.1  | 10.6 |
| DALYs<br>(Disability<br>-Adjusted<br>Life<br>Years) | Lao People's<br>Democratic<br>Republic | Both | Age-<br>standardized | Malaria | Rate | 2019 | 23.2  | 53.3  | 8.8  |

|                                                     |             |      |                      |         |      |      |      |      |     |
|-----------------------------------------------------|-------------|------|----------------------|---------|------|------|------|------|-----|
| DALYs<br>(Disability<br>-Adjusted<br>Life<br>Years) | Indonesia   | Both | Age-<br>standardized | Malaria | Rate | 2019 | 17.1 | 40.5 | 7.2 |
| DALYs<br>(Disability<br>-Adjusted<br>Life<br>Years) | Colombia    | Both | Age-<br>standardized | Malaria | Rate | 2019 | 8.5  | 21   | 2.1 |
| DALYs<br>(Disability<br>-Adjusted<br>Life<br>Years) | Suriname    | Both | Age-<br>standardized | Malaria | Rate | 2019 | 6.8  | 38.6 | 1.4 |
| DALYs<br>(Disability<br>-Adjusted<br>Life<br>Years) | Peru        | Both | Age-<br>standardized | Malaria | Rate | 2019 | 5.8  | 18.4 | 2.2 |
| DALYs<br>(Disability<br>-Adjusted<br>Life<br>Years) | Brazil      | Both | Age-<br>standardized | Malaria | Rate | 2019 | 5.4  | 11.3 | 2.6 |
| DALYs<br>(Disability<br>-Adjusted<br>Life<br>Years) | Nicaragua   | Both | Age-<br>standardized | Malaria | Rate | 2019 | 4.6  | 13   | 0.6 |
| DALYs<br>(Disability<br>-Adjusted<br>Life<br>Years) | Bangladesh  | Both | Age-<br>standardized | Malaria | Rate | 2019 | 4.6  | 22.6 | 0.9 |
| DALYs<br>(Disability<br>-Adjusted<br>Life<br>Years) | Viet Nam    | Both | Age-<br>standardized | Malaria | Rate | 2019 | 3.8  | 7.6  | 1.4 |
| DALYs<br>(Disability<br>-Adjusted<br>Life<br>Years) | Timor-Leste | Both | Age-<br>standardized | Malaria | Rate | 2019 | 3.1  | 4.1  | 2.2 |

|                                                     |                                        |      |                      |         |      |      |     |     |     |
|-----------------------------------------------------|----------------------------------------|------|----------------------|---------|------|------|-----|-----|-----|
| DALYs<br>(Disability<br>-Adjusted<br>Life<br>Years) | Bhutan                                 | Both | Age-<br>standardized | Malaria | Rate | 2019 | 2.9 | 5.3 | 1.7 |
| DALYs<br>(Disability<br>-Adjusted<br>Life<br>Years) | Philippines                            | Both | Age-<br>standardized | Malaria | Rate | 2019 | 2.6 | 8.1 | 0.6 |
| DALYs<br>(Disability<br>-Adjusted<br>Life<br>Years) | Dominican<br>Republic                  | Both | Age-<br>standardized | Malaria | Rate | 2019 | 2.4 | 8.8 | 0.6 |
| DALYs<br>(Disability<br>-Adjusted<br>Life<br>Years) | Malaysia                               | Both | Age-<br>standardized | Malaria | Rate | 2019 | 2.1 | 3.9 | 1.2 |
| DALYs<br>(Disability<br>-Adjusted<br>Life<br>Years) | Nepal                                  | Both | Age-<br>standardized | Malaria | Rate | 2019 | 1.4 | 3   | 0.7 |
| DALYs<br>(Disability<br>-Adjusted<br>Life<br>Years) | Honduras                               | Both | Age-<br>standardized | Malaria | Rate | 2019 | 1.4 | 3   | 0.2 |
| DALYs<br>(Disability<br>-Adjusted<br>Life<br>Years) | Guatemala                              | Both | Age-<br>standardized | Malaria | Rate | 2019 | 1.4 | 2.4 | 0.8 |
| DALYs<br>(Disability<br>-Adjusted<br>Life<br>Years) | Bolivia<br>(Plurinational<br>State of) | Both | Age-<br>standardized | Malaria | Rate | 2019 | 1.4 | 3.5 | 0.3 |
| DALYs<br>(Disability<br>-Adjusted<br>Life<br>Years) | Ecuador                                | Both | Age-<br>standardized | Malaria | Rate | 2019 | 1.2 | 3   | 0.5 |

|                                                     |                                                |      |                      |         |      |      |     |     |     |
|-----------------------------------------------------|------------------------------------------------|------|----------------------|---------|------|------|-----|-----|-----|
| DALYs<br>(Disability<br>-Adjusted<br>Life<br>Years) | Tajikistan                                     | Both | Age-<br>standardized | Malaria | Rate | 2019 | 1.2 | 1.6 | 0.9 |
| DALYs<br>(Disability<br>-Adjusted<br>Life<br>Years) | Democratic<br>People's<br>Republic of<br>Korea | Both | Age-<br>standardized | Malaria | Rate | 2019 | 1.2 | 2.2 | 0.6 |
| DALYs<br>(Disability<br>-Adjusted<br>Life<br>Years) | Iran (Islamic<br>Republic of)                  | Both | Age-<br>standardized | Malaria | Rate | 2019 | 1.1 | 1.5 | 0.8 |
| DALYs<br>(Disability<br>-Adjusted<br>Life<br>Years) | Thailand                                       | Both | Age-<br>standardized | Malaria | Rate | 2019 | 1.1 | 1.6 | 0.6 |
| DALYs<br>(Disability<br>-Adjusted<br>Life<br>Years) | Panama                                         | Both | Age-<br>standardized | Malaria | Rate | 2019 | 0.9 | 2.3 | 0.3 |
| DALYs<br>(Disability<br>-Adjusted<br>Life<br>Years) | Saudi Arabia                                   | Both | Age-<br>standardized | Malaria | Rate | 2019 | 0.5 | 1   | 0.3 |
| DALYs<br>(Disability<br>-Adjusted<br>Life<br>Years) | Algeria                                        | Both | Age-<br>standardized | Malaria | Rate | 2019 | 0.5 | 0.7 | 0.4 |
| DALYs<br>(Disability<br>-Adjusted<br>Life<br>Years) | El Salvador                                    | Both | Age-<br>standardized | Malaria | Rate | 2019 | 0.4 | 0.6 | 0.3 |
| DALYs<br>(Disability<br>-Adjusted<br>Life<br>Years) | Belize                                         | Both | Age-<br>standardized | Malaria | Rate | 2019 | 0.4 | 0.8 | 0   |

|                                                     |                          |      |                      |         |      |      |     |     |     |
|-----------------------------------------------------|--------------------------|------|----------------------|---------|------|------|-----|-----|-----|
| DALYs<br>(Disability<br>-Adjusted<br>Life<br>Years) | Republic of<br>Korea     | Both | Age-<br>standardized | Malaria | Rate | 2019 | 0.2 | 0.3 | 0.1 |
| DALYs<br>(Disability<br>-Adjusted<br>Life<br>Years) | Mexico                   | Both | Age-<br>standardized | Malaria | Rate | 2019 | 0.1 | 0.1 | 0.1 |
| DALYs<br>(Disability<br>-Adjusted<br>Life<br>Years) | China                    | Both | Age-<br>standardized | Malaria | Rate | 2019 | 0   | 0   | 0   |
| DALYs<br>(Disability<br>-Adjusted<br>Life<br>Years) | Kiribati                 | Both | Age-<br>standardized | Malaria | Rate | 2019 | 0   | 0   | 0   |
| DALYs<br>(Disability<br>-Adjusted<br>Life<br>Years) | Qatar                    | Both | Age-<br>standardized | Malaria | Rate | 2019 | 0   | 0   | 0   |
| DALYs<br>(Disability<br>-Adjusted<br>Life<br>Years) | Cuba                     | Both | Age-<br>standardized | Malaria | Rate | 2019 | 0   | 0   | 0   |
| DALYs<br>(Disability<br>-Adjusted<br>Life<br>Years) | Saint Kitts<br>and Nevis | Both | Age-<br>standardized | Malaria | Rate | 2019 | 0   | 0   | 0   |
| DALYs<br>(Disability<br>-Adjusted<br>Life<br>Years) | Luxembourg               | Both | Age-<br>standardized | Malaria | Rate | 2019 | 0   | 0   | 0   |
| DALYs<br>(Disability<br>-Adjusted<br>Life<br>Years) | Slovenia                 | Both | Age-<br>standardized | Malaria | Rate | 2019 | 0   | 0   | 0   |

|                                                     |                        |      |                      |         |      |      |   |   |   |
|-----------------------------------------------------|------------------------|------|----------------------|---------|------|------|---|---|---|
| DALYs<br>(Disability<br>-Adjusted<br>Life<br>Years) | Marshall<br>Islands    | Both | Age-<br>standardized | Malaria | Rate | 2019 | 0 | 0 | 0 |
| DALYs<br>(Disability<br>-Adjusted<br>Life<br>Years) | Bulgaria               | Both | Age-<br>standardized | Malaria | Rate | 2019 | 0 | 0 | 0 |
| DALYs<br>(Disability<br>-Adjusted<br>Life<br>Years) | Azerbaijan             | Both | Age-<br>standardized | Malaria | Rate | 2019 | 0 | 0 | 0 |
| DALYs<br>(Disability<br>-Adjusted<br>Life<br>Years) | Chile                  | Both | Age-<br>standardized | Malaria | Rate | 2019 | 0 | 0 | 0 |
| DALYs<br>(Disability<br>-Adjusted<br>Life<br>Years) | Egypt                  | Both | Age-<br>standardized | Malaria | Rate | 2019 | 0 | 0 | 0 |
| DALYs<br>(Disability<br>-Adjusted<br>Life<br>Years) | Trinidad and<br>Tobago | Both | Age-<br>standardized | Malaria | Rate | 2019 | 0 | 0 | 0 |
| DALYs<br>(Disability<br>-Adjusted<br>Life<br>Years) | Malta                  | Both | Age-<br>standardized | Malaria | Rate | 2019 | 0 | 0 | 0 |
| DALYs<br>(Disability<br>-Adjusted<br>Life<br>Years) | Uruguay                | Both | Age-<br>standardized | Malaria | Rate | 2019 | 0 | 0 | 0 |
| DALYs<br>(Disability<br>-Adjusted<br>Life<br>Years) | Croatia                | Both | Age-<br>standardized | Malaria | Rate | 2019 | 0 | 0 | 0 |

|                                                     |                                        |      |                      |         |      |      |   |   |   |
|-----------------------------------------------------|----------------------------------------|------|----------------------|---------|------|------|---|---|---|
| DALYs<br>(Disability<br>-Adjusted<br>Life<br>Years) | Cook Islands                           | Both | Age-<br>standardized | Malaria | Rate | 2019 | 0 | 0 | 0 |
| DALYs<br>(Disability<br>-Adjusted<br>Life<br>Years) | Georgia                                | Both | Age-<br>standardized | Malaria | Rate | 2019 | 0 | 0 | 0 |
| DALYs<br>(Disability<br>-Adjusted<br>Life<br>Years) | Micronesia<br>(Federated<br>States of) | Both | Age-<br>standardized | Malaria | Rate | 2019 | 0 | 0 | 0 |
| DALYs<br>(Disability<br>-Adjusted<br>Life<br>Years) | Kazakhstan                             | Both | Age-<br>standardized | Malaria | Rate | 2019 | 0 | 0 | 0 |
| DALYs<br>(Disability<br>-Adjusted<br>Life<br>Years) | Cyprus                                 | Both | Age-<br>standardized | Malaria | Rate | 2019 | 0 | 0 | 0 |
| DALYs<br>(Disability<br>-Adjusted<br>Life<br>Years) | Greenland                              | Both | Age-<br>standardized | Malaria | Rate | 2019 | 0 | 0 | 0 |
| DALYs<br>(Disability<br>-Adjusted<br>Life<br>Years) | Dominica                               | Both | Age-<br>standardized | Malaria | Rate | 2019 | 0 | 0 | 0 |
| DALYs<br>(Disability<br>-Adjusted<br>Life<br>Years) | Belarus                                | Both | Age-<br>standardized | Malaria | Rate | 2019 | 0 | 0 | 0 |
| DALYs<br>(Disability<br>-Adjusted<br>Life<br>Years) | Brunei<br>Darussalam                   | Both | Age-<br>standardized | Malaria | Rate | 2019 | 0 | 0 | 0 |

|                                                     |                         |      |                      |         |      |      |   |   |   |
|-----------------------------------------------------|-------------------------|------|----------------------|---------|------|------|---|---|---|
| DALYs<br>(Disability<br>-Adjusted<br>Life<br>Years) | Czechia                 | Both | Age-<br>standardized | Malaria | Rate | 2019 | 0 | 0 | 0 |
| DALYs<br>(Disability<br>-Adjusted<br>Life<br>Years) | Syrian Arab<br>Republic | Both | Age-<br>standardized | Malaria | Rate | 2019 | 0 | 0 | 0 |
| DALYs<br>(Disability<br>-Adjusted<br>Life<br>Years) | Singapore               | Both | Age-<br>standardized | Malaria | Rate | 2019 | 0 | 0 | 0 |
| DALYs<br>(Disability<br>-Adjusted<br>Life<br>Years) | Denmark                 | Both | Age-<br>standardized | Malaria | Rate | 2019 | 0 | 0 | 0 |
| DALYs<br>(Disability<br>-Adjusted<br>Life<br>Years) | Estonia                 | Both | Age-<br>standardized | Malaria | Rate | 2019 | 0 | 0 | 0 |
| DALYs<br>(Disability<br>-Adjusted<br>Life<br>Years) | Japan                   | Both | Age-<br>standardized | Malaria | Rate | 2019 | 0 | 0 | 0 |
| DALYs<br>(Disability<br>-Adjusted<br>Life<br>Years) | Finland                 | Both | Age-<br>standardized | Malaria | Rate | 2019 | 0 | 0 | 0 |
| DALYs<br>(Disability<br>-Adjusted<br>Life<br>Years) | Turkey                  | Both | Age-<br>standardized | Malaria | Rate | 2019 | 0 | 0 | 0 |
| DALYs<br>(Disability<br>-Adjusted<br>Life<br>Years) | Kyrgyzstan              | Both | Age-<br>standardized | Malaria | Rate | 2019 | 0 | 0 | 0 |

|                                                     |                         |      |                      |         |      |      |   |   |   |
|-----------------------------------------------------|-------------------------|------|----------------------|---------|------|------|---|---|---|
| DALYs<br>(Disability<br>-Adjusted<br>Life<br>Years) | Netherlands             | Both | Age-<br>standardized | Malaria | Rate | 2019 | 0 | 0 | 0 |
| DALYs<br>(Disability<br>-Adjusted<br>Life<br>Years) | United Arab<br>Emirates | Both | Age-<br>standardized | Malaria | Rate | 2019 | 0 | 0 | 0 |
| DALYs<br>(Disability<br>-Adjusted<br>Life<br>Years) | Samoa                   | Both | Age-<br>standardized | Malaria | Rate | 2019 | 0 | 0 | 0 |
| DALYs<br>(Disability<br>-Adjusted<br>Life<br>Years) | Maldives                | Both | Age-<br>standardized | Malaria | Rate | 2019 | 0 | 0 | 0 |
| DALYs<br>(Disability<br>-Adjusted<br>Life<br>Years) | Mauritius               | Both | Age-<br>standardized | Malaria | Rate | 2019 | 0 | 0 | 0 |
| DALYs<br>(Disability<br>-Adjusted<br>Life<br>Years) | Mongolia                | Both | Age-<br>standardized | Malaria | Rate | 2019 | 0 | 0 | 0 |
| DALYs<br>(Disability<br>-Adjusted<br>Life<br>Years) | Tuvalu                  | Both | Age-<br>standardized | Malaria | Rate | 2019 | 0 | 0 | 0 |
| DALYs<br>(Disability<br>-Adjusted<br>Life<br>Years) | Lithuania               | Both | Age-<br>standardized | Malaria | Rate | 2019 | 0 | 0 | 0 |
| DALYs<br>(Disability<br>-Adjusted<br>Life<br>Years) | New Zealand             | Both | Age-<br>standardized | Malaria | Rate | 2019 | 0 | 0 | 0 |

|                                                     |                        |      |                      |         |      |      |   |   |   |
|-----------------------------------------------------|------------------------|------|----------------------|---------|------|------|---|---|---|
| DALYs<br>(Disability<br>-Adjusted<br>Life<br>Years) | North<br>Macedonia     | Both | Age-<br>standardized | Malaria | Rate | 2019 | 0 | 0 | 0 |
| DALYs<br>(Disability<br>-Adjusted<br>Life<br>Years) | Australia              | Both | Age-<br>standardized | Malaria | Rate | 2019 | 0 | 0 | 0 |
| DALYs<br>(Disability<br>-Adjusted<br>Life<br>Years) | Canada                 | Both | Age-<br>standardized | Malaria | Rate | 2019 | 0 | 0 | 0 |
| DALYs<br>(Disability<br>-Adjusted<br>Life<br>Years) | Hungary                | Both | Age-<br>standardized | Malaria | Rate | 2019 | 0 | 0 | 0 |
| DALYs<br>(Disability<br>-Adjusted<br>Life<br>Years) | Republic of<br>Moldova | Both | Age-<br>standardized | Malaria | Rate | 2019 | 0 | 0 | 0 |
| DALYs<br>(Disability<br>-Adjusted<br>Life<br>Years) | Seychelles             | Both | Age-<br>standardized | Malaria | Rate | 2019 | 0 | 0 | 0 |
| DALYs<br>(Disability<br>-Adjusted<br>Life<br>Years) | Grenada                | Both | Age-<br>standardized | Malaria | Rate | 2019 | 0 | 0 | 0 |
| DALYs<br>(Disability<br>-Adjusted<br>Life<br>Years) | Spain                  | Both | Age-<br>standardized | Malaria | Rate | 2019 | 0 | 0 | 0 |
| DALYs<br>(Disability<br>-Adjusted<br>Life<br>Years) | Norway                 | Both | Age-<br>standardized | Malaria | Rate | 2019 | 0 | 0 | 0 |

|                                                     |                                    |      |                      |         |      |      |   |   |   |
|-----------------------------------------------------|------------------------------------|------|----------------------|---------|------|------|---|---|---|
| DALYs<br>(Disability<br>-Adjusted<br>Life<br>Years) | Tokelau                            | Both | Age-<br>standardized | Malaria | Rate | 2019 | 0 | 0 | 0 |
| DALYs<br>(Disability<br>-Adjusted<br>Life<br>Years) | Kuwait                             | Both | Age-<br>standardized | Malaria | Rate | 2019 | 0 | 0 | 0 |
| DALYs<br>(Disability<br>-Adjusted<br>Life<br>Years) | United States<br>of America        | Both | Age-<br>standardized | Malaria | Rate | 2019 | 0 | 0 | 0 |
| DALYs<br>(Disability<br>-Adjusted<br>Life<br>Years) | Jordan                             | Both | Age-<br>standardized | Malaria | Rate | 2019 | 0 | 0 | 0 |
| DALYs<br>(Disability<br>-Adjusted<br>Life<br>Years) | Iraq                               | Both | Age-<br>standardized | Malaria | Rate | 2019 | 0 | 0 | 0 |
| DALYs<br>(Disability<br>-Adjusted<br>Life<br>Years) | United States<br>Virgin<br>Islands | Both | Age-<br>standardized | Malaria | Rate | 2019 | 0 | 0 | 0 |
| DALYs<br>(Disability<br>-Adjusted<br>Life<br>Years) | Latvia                             | Both | Age-<br>standardized | Malaria | Rate | 2019 | 0 | 0 | 0 |
| DALYs<br>(Disability<br>-Adjusted<br>Life<br>Years) | San Marino                         | Both | Age-<br>standardized | Malaria | Rate | 2019 | 0 | 0 | 0 |
| DALYs<br>(Disability<br>-Adjusted<br>Life<br>Years) | Sri Lanka                          | Both | Age-<br>standardized | Malaria | Rate | 2019 | 0 | 0 | 0 |

|                                                     |                                  |      |                      |         |      |      |   |   |   |
|-----------------------------------------------------|----------------------------------|------|----------------------|---------|------|------|---|---|---|
| DALYs<br>(Disability<br>-Adjusted<br>Life<br>Years) | Guam                             | Both | Age-<br>standardized | Malaria | Rate | 2019 | 0 | 0 | 0 |
| DALYs<br>(Disability<br>-Adjusted<br>Life<br>Years) | Portugal                         | Both | Age-<br>standardized | Malaria | Rate | 2019 | 0 | 0 | 0 |
| DALYs<br>(Disability<br>-Adjusted<br>Life<br>Years) | Germany                          | Both | Age-<br>standardized | Malaria | Rate | 2019 | 0 | 0 | 0 |
| DALYs<br>(Disability<br>-Adjusted<br>Life<br>Years) | Taiwan<br>(Province of<br>China) | Both | Age-<br>standardized | Malaria | Rate | 2019 | 0 | 0 | 0 |
| DALYs<br>(Disability<br>-Adjusted<br>Life<br>Years) | Tunisia                          | Both | Age-<br>standardized | Malaria | Rate | 2019 | 0 | 0 | 0 |
| DALYs<br>(Disability<br>-Adjusted<br>Life<br>Years) | France                           | Both | Age-<br>standardized | Malaria | Rate | 2019 | 0 | 0 | 0 |
| DALYs<br>(Disability<br>-Adjusted<br>Life<br>Years) | Greece                           | Both | Age-<br>standardized | Malaria | Rate | 2019 | 0 | 0 | 0 |
| DALYs<br>(Disability<br>-Adjusted<br>Life<br>Years) | Iceland                          | Both | Age-<br>standardized | Malaria | Rate | 2019 | 0 | 0 | 0 |
| DALYs<br>(Disability<br>-Adjusted<br>Life<br>Years) | Andorra                          | Both | Age-<br>standardized | Malaria | Rate | 2019 | 0 | 0 | 0 |

|                                                     |                        |      |                      |         |      |      |   |   |   |
|-----------------------------------------------------|------------------------|------|----------------------|---------|------|------|---|---|---|
| DALYs<br>(Disability<br>-Adjusted<br>Life<br>Years) | American<br>Samoa      | Both | Age-<br>standardized | Malaria | Rate | 2019 | 0 | 0 | 0 |
| DALYs<br>(Disability<br>-Adjusted<br>Life<br>Years) | Sweden                 | Both | Age-<br>standardized | Malaria | Rate | 2019 | 0 | 0 | 0 |
| DALYs<br>(Disability<br>-Adjusted<br>Life<br>Years) | Monaco                 | Both | Age-<br>standardized | Malaria | Rate | 2019 | 0 | 0 | 0 |
| DALYs<br>(Disability<br>-Adjusted<br>Life<br>Years) | Antigua and<br>Barbuda | Both | Age-<br>standardized | Malaria | Rate | 2019 | 0 | 0 | 0 |
| DALYs<br>(Disability<br>-Adjusted<br>Life<br>Years) | United<br>Kingdom      | Both | Age-<br>standardized | Malaria | Rate | 2019 | 0 | 0 | 0 |
| DALYs<br>(Disability<br>-Adjusted<br>Life<br>Years) | Nauru                  | Both | Age-<br>standardized | Malaria | Rate | 2019 | 0 | 0 | 0 |
| DALYs<br>(Disability<br>-Adjusted<br>Life<br>Years) | Bermuda                | Both | Age-<br>standardized | Malaria | Rate | 2019 | 0 | 0 | 0 |
| DALYs<br>(Disability<br>-Adjusted<br>Life<br>Years) | Ireland                | Both | Age-<br>standardized | Malaria | Rate | 2019 | 0 | 0 | 0 |
| DALYs<br>(Disability<br>-Adjusted<br>Life<br>Years) | Saint Lucia            | Both | Age-<br>standardized | Malaria | Rate | 2019 | 0 | 0 | 0 |

|                                                     |                                           |      |                      |         |      |      |   |   |   |
|-----------------------------------------------------|-------------------------------------------|------|----------------------|---------|------|------|---|---|---|
| DALYs<br>(Disability<br>-Adjusted<br>Life<br>Years) | Barbados                                  | Both | Age-<br>standardized | Malaria | Rate | 2019 | 0 | 0 | 0 |
| DALYs<br>(Disability<br>-Adjusted<br>Life<br>Years) | Switzerland                               | Both | Age-<br>standardized | Malaria | Rate | 2019 | 0 | 0 | 0 |
| DALYs<br>(Disability<br>-Adjusted<br>Life<br>Years) | Palau                                     | Both | Age-<br>standardized | Malaria | Rate | 2019 | 0 | 0 | 0 |
| DALYs<br>(Disability<br>-Adjusted<br>Life<br>Years) | Costa Rica                                | Both | Age-<br>standardized | Malaria | Rate | 2019 | 0 | 0 | 0 |
| DALYs<br>(Disability<br>-Adjusted<br>Life<br>Years) | Israel                                    | Both | Age-<br>standardized | Malaria | Rate | 2019 | 0 | 0 | 0 |
| DALYs<br>(Disability<br>-Adjusted<br>Life<br>Years) | Paraguay                                  | Both | Age-<br>standardized | Malaria | Rate | 2019 | 0 | 0 | 0 |
| DALYs<br>(Disability<br>-Adjusted<br>Life<br>Years) | Saint<br>Vincent and<br>the<br>Grenadines | Both | Age-<br>standardized | Malaria | Rate | 2019 | 0 | 0 | 0 |
| DALYs<br>(Disability<br>-Adjusted<br>Life<br>Years) | Argentina                                 | Both | Age-<br>standardized | Malaria | Rate | 2019 | 0 | 0 | 0 |
| DALYs<br>(Disability<br>-Adjusted<br>Life<br>Years) | Puerto Rico                               | Both | Age-<br>standardized | Malaria | Rate | 2019 | 0 | 0 | 0 |

|                                                     |                       |      |                      |         |      |      |   |   |   |
|-----------------------------------------------------|-----------------------|------|----------------------|---------|------|------|---|---|---|
| DALYs<br>(Disability<br>-Adjusted<br>Life<br>Years) | Russian<br>Federation | Both | Age-<br>standardized | Malaria | Rate | 2019 | 0 | 0 | 0 |
| DALYs<br>(Disability<br>-Adjusted<br>Life<br>Years) | Jamaica               | Both | Age-<br>standardized | Malaria | Rate | 2019 | 0 | 0 | 0 |
| DALYs<br>(Disability<br>-Adjusted<br>Life<br>Years) | Bahamas               | Both | Age-<br>standardized | Malaria | Rate | 2019 | 0 | 0 | 0 |
| DALYs<br>(Disability<br>-Adjusted<br>Life<br>Years) | Albania               | Both | Age-<br>standardized | Malaria | Rate | 2019 | 0 | 0 | 0 |
| DALYs<br>(Disability<br>-Adjusted<br>Life<br>Years) | Armenia               | Both | Age-<br>standardized | Malaria | Rate | 2019 | 0 | 0 | 0 |
| DALYs<br>(Disability<br>-Adjusted<br>Life<br>Years) | Niue                  | Both | Age-<br>standardized | Malaria | Rate | 2019 | 0 | 0 | 0 |
| DALYs<br>(Disability<br>-Adjusted<br>Life<br>Years) | Serbia                | Both | Age-<br>standardized | Malaria | Rate | 2019 | 0 | 0 | 0 |
| DALYs<br>(Disability<br>-Adjusted<br>Life<br>Years) | Morocco               | Both | Age-<br>standardized | Malaria | Rate | 2019 | 0 | 0 | 0 |
| DALYs<br>(Disability<br>-Adjusted<br>Life<br>Years) | Turkmenista<br>n      | Both | Age-<br>standardized | Malaria | Rate | 2019 | 0 | 0 | 0 |

|                                                     |                                |      |                      |         |      |      |   |   |   |
|-----------------------------------------------------|--------------------------------|------|----------------------|---------|------|------|---|---|---|
| DALYs<br>(Disability<br>-Adjusted<br>Life<br>Years) | Bosnia and<br>Herzegovina      | Both | Age-<br>standardized | Malaria | Rate | 2019 | 0 | 0 | 0 |
| DALYs<br>(Disability<br>-Adjusted<br>Life<br>Years) | Slovakia                       | Both | Age-<br>standardized | Malaria | Rate | 2019 | 0 | 0 | 0 |
| DALYs<br>(Disability<br>-Adjusted<br>Life<br>Years) | Northern<br>Mariana<br>Islands | Both | Age-<br>standardized | Malaria | Rate | 2019 | 0 | 0 | 0 |
| DALYs<br>(Disability<br>-Adjusted<br>Life<br>Years) | Lebanon                        | Both | Age-<br>standardized | Malaria | Rate | 2019 | 0 | 0 | 0 |
| DALYs<br>(Disability<br>-Adjusted<br>Life<br>Years) | Bahrain                        | Both | Age-<br>standardized | Malaria | Rate | 2019 | 0 | 0 | 0 |
| DALYs<br>(Disability<br>-Adjusted<br>Life<br>Years) | Palestine                      | Both | Age-<br>standardized | Malaria | Rate | 2019 | 0 | 0 | 0 |
| DALYs<br>(Disability<br>-Adjusted<br>Life<br>Years) | Fiji                           | Both | Age-<br>standardized | Malaria | Rate | 2019 | 0 | 0 | 0 |
| DALYs<br>(Disability<br>-Adjusted<br>Life<br>Years) | Tonga                          | Both | Age-<br>standardized | Malaria | Rate | 2019 | 0 | 0 | 0 |
| DALYs<br>(Disability<br>-Adjusted<br>Life<br>Years) | Montenegro                     | Both | Age-<br>standardized | Malaria | Rate | 2019 | 0 | 0 | 0 |

|                                                     |            |      |                      |         |      |      |   |   |   |
|-----------------------------------------------------|------------|------|----------------------|---------|------|------|---|---|---|
| DALYs<br>(Disability<br>-Adjusted<br>Life<br>Years) | Uzbekistan | Both | Age-<br>standardized | Malaria | Rate | 2019 | 0 | 0 | 0 |
| DALYs<br>(Disability<br>-Adjusted<br>Life<br>Years) | Ukraine    | Both | Age-<br>standardized | Malaria | Rate | 2019 | 0 | 0 | 0 |
| DALYs<br>(Disability<br>-Adjusted<br>Life<br>Years) | Libya      | Both | Age-<br>standardized | Malaria | Rate | 2019 | 0 | 0 | 0 |
| DALYs<br>(Disability<br>-Adjusted<br>Life<br>Years) | Oman       | Both | Age-<br>standardized | Malaria | Rate | 2019 | 0 | 0 | 0 |
| DALYs<br>(Disability<br>-Adjusted<br>Life<br>Years) | Austria    | Both | Age-<br>standardized | Malaria | Rate | 2019 | 0 | 0 | 0 |
| DALYs<br>(Disability<br>-Adjusted<br>Life<br>Years) | Poland     | Both | Age-<br>standardized | Malaria | Rate | 2019 | 0 | 0 | 0 |
| DALYs<br>(Disability<br>-Adjusted<br>Life<br>Years) | Belgium    | Both | Age-<br>standardized | Malaria | Rate | 2019 | 0 | 0 | 0 |
| DALYs<br>(Disability<br>-Adjusted<br>Life<br>Years) | Romania    | Both | Age-<br>standardized | Malaria | Rate | 2019 | 0 | 0 | 0 |
| DALYs<br>(Disability<br>-Adjusted<br>Life<br>Years) | Lesotho    | Both | Age-<br>standardized | Malaria | Rate | 2019 | 0 | 0 | 0 |

DALYs  
(Disability  
-Adjusted  
Life  
Years)

|       |      |                      |         |      |      |   |   |   |
|-------|------|----------------------|---------|------|------|---|---|---|
| Italy | Both | Age-<br>standardized | Malaria | Rate | 2019 | 0 | 0 | 0 |
|-------|------|----------------------|---------|------|------|---|---|---|
